# Supplementary material for: Using Haplotype-Based Artificial Intelligence to Evaluate SARS-CoV-2 Novel Variants and Mutations
Source: PubMed Central journal article supplement (PMC9945077; doi:10.1001/jamanetworkopen.2023.0191), 2023-02-21

## Supplemental Online Content

Zhao LP, Cohen S, Zhao M, et al. Using haplotype-based artificial intelligence to evaluate SARS-CoV-2 novel variants and mutations. *JAMA Netw Open*. 2023;6(2):e230191. doi:10.1001/jamanetworkopen.2023.0191

### **eMethods.**

**eTable 1.** A List of Known Variants Assigned by GISAID

**eTable 2.** Haplotype Frequencies Among Alpha Viruses

**eTable 3.** Haplotype Frequencies Among Beta Viruses

**eTable 4.** Haplotype Frequencies Among Delta Viruses

**eTable 5.** Haplotype Frequencies Among Epsilon Viruses

**eTable 6.** Haplotype Frequencies Among Eta Viruses

**eTable 7.** Haplotype Frequencies Among Gamma Viruses

**eTable 8.** Haplotype Frequencies Among GH/490R Viruses

**eTable 9.** Haplotype Frequencies Among Iota Viruses

**eTable 10.** Haplotype Frequencies Among Kappa Viruses

**eTable 11.** Haplotype Frequencies Among Lambda Viruses

**eTable 12.** Haplotype Frequencies Among Mu Viruses

**eTable 13.** Haplotype Frequencies Among Omicron Viruses

**eTable 14.** Haplotype Frequencies Among Theta Viruses

**eTable 15.** Haplotype Frequencies Among Zeta Viruses

**eTable 16.** Concordance Analysis in the Training Set

**eTable 17.** Concordance Analysis in the Validation Set

**eTable 18.** Concordance Analysis in the Prospective Set

**eTable 19.** Four Mixture Variants with Omicron-Delta

**eTable 20.** Four Mixture Variants with Omicron-Alpha

**eTable 21.** Four Mixture Variants with Omicron-Zeta

**eTable 22.** Four Mixture Variants with Omicron-Epsilon

**eTable 23.** Mixture Variant and Corresponding Lineages

**eTable 24.** Unidentifiable Omicron Viruses and Corresponding Lineages

**eTable 25.** New Mutations Among Variant-Unassigned and Unidentifiable Viruses

**eFigure 1.** Heatmap-Representation of Selected Polymutant Temporal Profile From January 1, 2020 to March 14, 2022 Within Every Variant

**eFigure 2.** Misclassification Errors by Haplotype-Based Variant Prediction (HVP), When the Prediction Probability Threshold Value is Set at 0.9 to 1

**eFigure 3.** Temporal Patterns of Sixteen Polymutants Identified From Variant-Unassigned 524 Viruses That Are Unpredictable by HAI, Excluding Those Core Polymutants of All Fourteen Variants

This supplemental material has been provided by the authors to give readers additional information about their work.

## eMethods

**Polymutants.** GISAID is continuously receiving and archiving viral sequences globally, along with sample-specific metadata. Besides date and location of collecting viruses, the pertinent data to this project are extracted substituting amino acids (known as “AA.substitutions”), from aligning nucleotide sequence and translating nucleotides to amino acids by GISAID. Upon obtaining the text string on all substituting amino acids, we process all individual samples, and align all substitutions in a matrix form. In comparison with amino acids in the reference sequence, we convert the amino acid substitution matrix into a matrix of binary indicators (0, 1) for wildtype and mutant type, respectively. Note that most amino acids are monomorphic, some take one mutant type, and very few amino acids may have more than two substituting mutants. We call an amino acid a polymutant if it includes three or more mutating amino acids in the study population. While being conceptually straightforward, converting text strings of AA.substitutions into polymutant matrix and a matrix of binary polymutant indicators enables computations required by Statistical Learning Strategy (SLS).

**Modeling Temporal Trends.** Each polymutant has a specific temporal expansion pattern. Let binary indicator  $y_{jt}$  ( $= 1$  or  $0$ ) denote the presence or absence the of mutant type, respectively, observed at time  $t$  for the  $j$ th polymutant. To model the non-linear temporal expansion, we applied a generalized additive model (GAM) to regress the mutant indicator over sample collection time via the following probability model,

$$\Pr(y_{jt} = 1 | t) = \frac{1}{1 + \exp[-\alpha - s_j(t)]}, \quad (1)$$

where  $\alpha$  is a constant coefficient and  $s_j(t)$  is a non-linear function of time  $t$ , and both are estimated by the restricted maximum likelihood method<sup>1</sup>. Upon completing the estimation, the above function is used with the estimated coefficient and non-linear function to compute the probability of observing mutating amino acid at the time  $t$ , yielding a  $p$ -value that measures if the function  $s_j(t)$  deviates from zero. Also produced is the maximum proportion as  $P_{\max} = \max[\Pr(y_{jt} = 1 | t)]$ . The function “gam” was used to fit the GAM (R packages MGCV<sup>2</sup>). The smoothing parameter  $k = 7$  was chosen.

Upon fitting the GAM, SLS can use the fitted values to compute locally averaged mutation percentage (LAMP) daily from the first to the last reporting day. The temporal pattern of LAMP can be used to describe the temporal expansion of the  $j$ th polymutant. By using  $p$ -value, SLS calls a polymutant with a significant trend, if  $p$ -value  $< 0.05$ , and with a substantial presence if the maximum proportion (Pmax) is greater than 10%.

**Haplotype Analysis.** SARS-COV-2 is an RNA virus, i.e., a single strand, and thus multiple polymutants from the same virus share the same haplotype. Once two or more polymutants are identified, SLS converts polymutant matrix to a vector of polymutant haplotypes and computes their haplotype frequencies as part of the haplotype analysis. When confining the analysis to viruses of a specific variant, SLS can generate variant specific haplotype frequencies, denoted as  $f(h | \text{variant})$ .

**Bayes' Prediction Probability.** When predicting variant type based on viral sequences or polymutant haplotype ( $H$ ), the haplotype-based artificial intelligence (HAI) relies on the following posterior probability:

$$\Pr(V | H = h) = \frac{f(H = h | \text{Variant} = V)p(\text{Variant} = V)}{\sum_V f(H = h | \text{Variant} = V)p(\text{Variant} = V)}, \quad (2)$$

in which the summation is over all possible variants,  $f(H = h | \text{Variant} = V)$  is an empirically estimated haplotype frequency of a specific viral variant, and  $p(\text{Variant} = V)$  is the proportion of the variant. Note that HAI treats variant-unassigned viruses as a separate class. On each virus, HAI computes an array of variant-specific prediction probabilities. If a prediction probability exceeds 0.99,

HAI predicts the corresponding variant. If the prediction probability for the variant-unassigned viruses exceeds 0.99, HAI predicts that the corresponding viruses do not have any known variant assignment, i.e., unpredictable (**UP**). Otherwise, HAI predicts that viruses include a mixture variant (**MV**) of two or more variant-specific haplotypes. Note that the posterior probability above (2) is strictly derived under the assumption that all variants are exclusive of each other, but, when dealing with recombinants, the quantity on the right hand side (2) is preferably interpreted as a risk score, in which the summation in the denominator serves as a normalizing factor so that the summation of all risk scores equals one.

**Post-prediction modification.** Among those MV predictions, their polymutant haplotypes include polymutants of two or more variants, some of which are recombinants. To tease out which MVs are recombinants, HAI utilizes a post-prediction modification. It extracts variant-specific polymutants. We call a MV recombinant if the polymutant includes mutating amino acids from two variants. For all other MVs, they will be re-assigned to be of specific variants.

**Statistical Software.** The statistical package R (version: R 4.2.1) and RStudio (Release 782775e, 2022-07-22) are used to implement all computational procedures in the HAI.

eTable 1. A List of Known Variants Assigned by GISAID

Fourteen variants established at GISAID and their basic annotations: WHO nomenclature, clade/lineages assigned by phylogenetic analysis, location(s) where the variant is first reported, and current designation by CDC

| <b>ID</b> | <b>WHO</b> | <b>Clade/Lineages</b>                    | <b>First Detect in</b>          | <b>Variant</b> |
|-----------|------------|------------------------------------------|---------------------------------|----------------|
| 1         | Alpha      | B.1.1.7+Q.*                              | United Kingdom                  | VOC            |
| 2         | Beta       | GH/501Y.V2 (B.1.351+B.1.351.2+B.1.351.3) | South Africa                    | VOC            |
| 3         | Delta      | GK (B.1.617.2+AY.*)                      | India                           | VOC            |
| 4         | Epsilon    | GH/452R.V1 (B.1.429+B.1.427)             | USA/California                  | VOI            |
| 5         | Eta        | G/484K.V3 (B.1.525)                      | UK/Nigeria                      | VOI            |
| 6         | Gamma      | GR/501Y.V3 (P.1+P.1.*)                   | Brazil/Japan                    | VOC            |
| 7         | GH/490R    | (B.1.640+B.1.640.*)                      | Congo/France                    | VUM            |
| 8         | Iota       | GH/253G.V1 (B.1.526)                     | USA/New York                    | VOI            |
| 9         | Kappa      | G/452R.V3 (B.1.617.1)                    | India                           | VOI            |
| 10        | Lambda     | GR/452Q.V1 (C.37+C.37.1)                 | Peru                            | VOI            |
| 11        | Mu         | GH (B.1.621+B.1.621.1)                   | Colombia                        | VOI            |
| 12        | Omicron    | GRA (B.1.1.529+BA.*)                     | Botswana/South Africa/Hong Kong | VOC            |
| 13        | Theta      | GR/1092K.V1 (P.3)                        | Philippines                     | VOI            |
| 14        | Zeta       | GR/484K.V2 (P.2)                         | Brazil                          | VOI            |

eTable 2. Haplotype Frequencies Among Alpha Viruses

alpha. Haplotype frequencies of core haplotypes associated with alpha-specific polymutants, for those haplotypes with 0.1% haplotype frequency.

| ID | Count  | Freq   | Mut | NSP3 | NSP3 | NSP3  | NSP12 | NSP12 | NSP13 | Spike | Spike | Spike | Spike | Spike | Spike | Spike | NS8 | NS8 | N  | N    | N    | N    |
|----|--------|--------|-----|------|------|-------|-------|-------|-------|-------|-------|-------|-------|-------|-------|-------|-----|-----|----|------|------|------|
|    |        |        |     | T183 | A890 | I1412 | P227  | P323  | K460  | N501  | A570  | D614  | P681  | T716  | S982  | D1118 | R52 | Y73 | D3 | R203 | G204 | S235 |
| 1  | 293153 | 51.06% | 17  | I    | D    | T     | P     | L     | K     | Y     | D     | G     | H     | I     | A     | H     | I   | C   | L  | K    | R    | F    |
| 2  | 105858 | 18.44% | 18  | .    | .    | .     | .     | .     | R     | .     | .     | .     | .     | .     | .     | .     | .   | .   | .  | .    | .    | .    |
| 3  | 67800  | 11.81% | 18  | .    | .    | .     | L     | .     | .     | .     | .     | .     | .     | .     | .     | .     | .   | .   | .  | .    | .    | .    |
| 4  | 36990  | 6.44%  | 17  | .    | .    | .     | .     | .     | .     | .     | .     | .     | .     | .     | .     | .     | .   | .   | .  | .    | P    | .    |
| 5  | 4410   | 0.77%  | 16  | .    | .    | I     | .     | .     | .     | .     | .     | .     | .     | .     | .     | .     | .   | .   | .  | .    | .    | .    |
| 6  | 4203   | 0.73%  | 16  | .    | .    | .     | .     | .     | .     | N     | .     | .     | .     | .     | .     | .     | .   | .   | .  | .    | .    | .    |
| 7  | 3217   | 0.56%  | 16  | .    | .    | .     | .     | .     | .     | .     | .     | .     | .     | .     | .     | .     | .   | .   | D  | .    | .    | .    |
| 8  | 2174   | 0.38%  | 15  | .    | .    | .     | .     | .     | .     | .     | .     | .     | .     | .     | .     | .     | .   | .   | .  | R    | G    | .    |
| 9  | 2081   | 0.36%  | 17  | .    | .    | I     | .     | .     | R     | .     | .     | .     | .     | .     | .     | .     | .   | .   | .  | .    | .    | .    |
| 10 | 1904   | 0.33%  | 17  | .    | .    | .     | .     | .     | R     | N     | .     | .     | .     | .     | .     | .     | .   | .   | .  | .    | .    | .    |
| 11 | 1777   | 0.31%  | 17  | .    | .    | .     | L     | .     | .     | N     | .     | .     | .     | .     | .     | .     | .   | .   | .  | .    | .    | .    |
| 12 | 1524   | 0.27%  | 17  | .    | .    | I     | L     | .     | .     | .     | .     | .     | .     | .     | .     | .     | .   | .   | .  | .    | .    | .    |
| 13 | 1361   | 0.24%  | 17  | .    | .    | .     | .     | .     | .     | .     | .     | .     | .     | .     | .     | .     | .   | .   | .  | E    | P    | .    |
| 14 | 1226   | 0.21%  | 16  | .    | .    | .     | .     | .     | .     | .     | .     | .     | .     | .     | .     | .     | R   | .   | .  | .    | .    | .    |
| 15 | 1086   | 0.19%  | 16  | .    | .    | .     | .     | P     | .     | .     | .     | .     | .     | .     | .     | .     | .   | .   | .  | .    | .    | .    |
| 16 | 1013   | 0.18%  | 14  | .    | .    | .     | .     | .     | .     | .     | .     | .     | .     | .     | .     | .     | .   | .   | .  | R    | G    | S    |
| 17 | 947    | 0.16%  | 17  | .    | .    | .     | L     | .     | .     | .     | .     | .     | .     | .     | .     | .     | .   | .   | D  | .    | .    | .    |
| 18 | 942    | 0.16%  | 17  | .    | .    | .     | .     | .     | R     | .     | .     | .     | .     | .     | .     | .     | .   | .   | D  | .    | .    | .    |
| 19 | 847    | 0.15%  | 16  | .    | .    | .     | L     | .     | .     | .     | .     | .     | T     | S     | .     | .     | .   | .   | .  | .    | .    | .    |
| 20 | 810    | 0.14%  | 17  | .    | .    | .     | .     | .     | .     | .     | .     | .     | .     | .     | Y     | .     | .   | .   | .  | .    | .    | .    |
| 21 | 786    | 0.14%  | 18  | .    | .    | .     | .     | .     | R     | .     | .     | R     | .     | .     | .     | .     | .   | .   | .  | .    | .    | .    |
| 22 | 719    | 0.13%  | 16  | .    | .    | .     | .     | .     | R     | .     | .     | .     | .     | .     | .     | R     | Y   | .   | .  | .    | .    | .    |
| 23 | 710    | 0.12%  | 15  | .    | .    | .     | .     | .     | .     | .     | .     | .     | .     | .     | .     | R     | Y   | .   | .  | .    | .    | .    |
| 24 | 677    | 0.12%  | 16  | .    | A    | .     | .     | .     | .     | .     | .     | .     | .     | .     | .     | .     | .   | .   | .  | .    | .    | .    |
| 25 | 677    | 0.12%  | 16  | .    | .    | .     | .     | .     | .     | .     | .     | .     | .     | .     | .     | .     | .   | .   | .  | .    | .    | S    |
| 26 | 647    | 0.11%  | 16  | T    | .    | .     | .     | .     | .     | .     | .     | .     | .     | .     | .     | .     | .   | .   | .  | .    | .    | .    |
| 27 | 631    | 0.11%  | 18  | .    | .    | .     | L     | .     | .     | .     | .     | .     | .     | .     | .     | Y     | .   | .   | .  | .    | .    | .    |
| 28 | 617    | 0.11%  | 15  | .    | .    | .     | .     | .     | .     | .     | .     | .     | T     | S     | .     | .     | .   | .   | .  | .    | .    | .    |
| 29 | 592    | 0.10%  | 14  | .    | .    | .     | .     | .     | .     | .     | .     | .     | .     | .     | .     | .     | .   | D   | R  | G    | .    | .    |
| 30 | 587    | 0.10%  | 16  | .    | .    | .     | .     | .     | R     | .     | .     | .     | T     | S     | .     | .     | .   | .   | .  | .    | .    | .    |

eTable 3. Haplotype Frequencies Among Beta Viruses

Beta. Haplotype frequencies of core haplotypes associated with variant-specific polymutants, for those haplotypes with 0.1% haplotype frequency.

| ID | Count | Freq   | Mut | NSP2 | NSP3 | NSP3 | NSP3  | NSP5 | NSP12 | NSP13 | Spike | Spike | Spike | Spike | Spike | Spike | NS3  | NS3  | E   | NS8  | N   |      |      |
|----|-------|--------|-----|------|------|------|-------|------|-------|-------|-------|-------|-------|-------|-------|-------|------|------|-----|------|-----|------|------|
|    |       |        |     | T85  | S794 | K837 | N1778 | K90  | P323  | T588  | L18   | D80   | D215  | K417  | E484  | N501  | D614 | A701 | Q57 | S171 | P71 | I121 | T205 |
| 1  | 3323  | 15.78% | 15  | I    | S    | N    | N     | R    | L     | T     | L     | A     | G     | N     | K     | Y     | G    | V    | H   | L    | L   | I    | I    |
| 2  | 2770  | 13.16% | 16  | .    | .    | .    | .     | .    | .     | .     | F     | .     | .     | .     | .     | .     | .    | .    | .   | .    | .   | .    | .    |
| 3  | 1733  | 8.23%  | 16  | .    | L    | .    | .     | .    | .     | .     | .     | .     | .     | .     | .     | .     | .    | .    | .   | .    | .   | .    | .    |
| 4  | 1703  | 8.09%  | 17  | .    | .    | .    | S     | .    | .     | .     | F     | .     | .     | .     | .     | .     | .    | .    | .   | .    | .   | .    | .    |
| 5  | 1411  | 6.70%  | 17  | .    | .    | .    | .     | .    | .     | I     | .     | .     | .     | .     | .     | .     | .    | .    | .   | .    | .   | L    | .    |
| 6  | 982   | 4.66%  | 17  | .    | .    | .    | .     | .    | .     | .     | F     | .     | .     | .     | .     | .     | .    | .    | .   | .    | .   | L    | .    |
| 7  | 933   | 4.43%  | 16  | .    | .    | .    | .     | .    | H     | .     | F     | .     | .     | .     | .     | .     | .    | .    | .   | .    | .   | .    | .    |
| 8  | 385   | 1.83%  | 13  | .    | .    | .    | .     | .    | .     | .     | .     | .     | .     | E     | N     | .     | .    | .    | .   | .    | .   | .    | .    |
| 9  | 372   | 1.77%  | 16  | .    | .    | .    | .     | .    | .     | .     | .     | .     | .     | .     | .     | .     | .    | .    | .   | .    | .   | L    | .    |
| 10 | 276   | 1.31%  | 18  | .    | .    | .    | S     | .    | .     | .     | F     | .     | .     | .     | .     | .     | .    | .    | .   | .    | .   | L    | .    |
| 11 | 270   | 1.28%  | 16  | .    | .    | .    | .     | .    | .     | I     | .     | .     | .     | .     | .     | .     | .    | .    | .   | .    | .   | .    | .    |
| 12 | 241   | 1.14%  | 14  | .    | .    | .    | .     | .    | .     | .     | F     | .     | .     | E     | N     | .     | .    | .    | .   | .    | .   | .    | .    |
| 13 | 220   | 1.04%  | 13  | .    | .    | .    | .     | .    | .     | .     | D     | D     | .     | .     | .     | .     | .    | .    | .   | .    | .   | .    | .    |
| 14 | 209   | 0.99%  | 17  | .    | L    | .    | .     | .    | .     | .     | .     | .     | .     | .     | .     | .     | .    | .    | .   | .    | .   | L    | .    |
| 15 | 195   | 0.93%  | 14  | .    | .    | K    | .     | .    | .     | I     | .     | .     | K     | .     | .     | .     | S    | .    | L   | .    | .   | .    | .    |
| 16 | 187   | 0.89%  | 15  | .    | .    | .    | .     | .    | .     | I     | .     | .     | K     | .     | .     | S     | .    | L    | .   | .    | .   | .    | .    |
| 17 | 118   | 0.56%  | 15  | .    | .    | S    | .     | .    | .     | F     | .     | .     | E     | N     | .     | .     | .    | .    | .   | .    | .   | .    | .    |
| 18 | 115   | 0.55%  | 14  | .    | .    | .    | .     | .    | .     | .     | D     | .     | .     | .     | .     | .     | .    | .    | .   | .    | .   | .    | .    |
| 19 | 106   | 0.50%  | 14  | .    | L    | .    | .     | .    | .     | .     | .     | .     | E     | N     | .     | .     | .    | .    | .   | .    | .   | .    | .    |
| 20 | 98    | 0.47%  | 15  | .    | .    | .    | .     | .    | .     | I     | .     | .     | E     | N     | .     | .     | .    | .    | .   | .    | .   | L    | .    |
| 21 | 96    | 0.46%  | 14  | .    | .    | .    | .     | .    | .     | .     | .     | .     | .     | .     | .     | S     | .    | .    | .   | .    | .   | .    | .    |
| 22 | 95    | 0.45%  | 15  | .    | .    | .    | .     | .    | .     | F     | .     | .     | .     | .     | .     | S     | .    | .    | .   | .    | .   | .    | .    |
| 23 | 93    | 0.44%  | 17  | .    | .    | .    | .     | .    | H     | .     | F     | .     | .     | .     | .     | .     | .    | .    | .   | .    | L   | .    | .    |
| 24 | 83    | 0.39%  | 14  | .    | .    | .    | .     | .    | .     | .     | .     | .     | E     | .     | .     | .     | .    | .    | .   | .    | .   | .    | .    |
| 25 | 77    | 0.37%  | 14  | .    | .    | .    | .     | .    | .     | .     | .     | K     | .     | .     | .     | .     | .    | .    | .   | .    | .   | .    | .    |
| 26 | 72    | 0.34%  | 14  | .    | .    | .    | .     | H    | .     | F     | .     | .     | E     | N     | .     | .     | .    | .    | .   | .    | .   | .    | .    |
| 27 | 71    | 0.34%  | 14  | .    | .    | .    | .     | .    | .     | .     | .     | .     | .     | .     | .     | .     | .    | .    | .   | .    | .   | .    | T    |
| 28 | 70    | 0.33%  | 15  | .    | .    | .    | .     | .    | .     | F     | .     | K     | .     | .     | .     | .     | .    | .    | .   | .    | .   | .    | .    |
| 29 | 65    | 0.31%  | 10  | .    | .    | K    | .     | .    | .     | .     | D     | D     | .     | .     | A     | .     | S    | .    | .   | .    | .   | .    | .    |
| 30 | 61    | 0.29%  | 15  | .    | .    | K    | .     | .    | .     | F     | .     | .     | .     | .     | .     | .     | .    | .    | .   | .    | .   | .    | .    |
| 31 | 60    | 0.28%  | 12  | .    | .    | K    | .     | .    | .     | .     | .     | .     | E     | N     | .     | .     | .    | .    | .   | .    | .   | .    | .    |
| 32 | 56    | 0.27%  | 15  | .    | .    | .    | .     | .    | .     | F     | .     | .     | E     | N     | .     | .     | .    | .    | .   | .    | L   | .    | .    |
| 33 | 54    | 0.26%  | 14  | .    | .    | .    | .     | .    | .     | .     | .     | .     | E     | N     | .     | .     | .    | .    | .   | .    | L   | .    | .    |
| 34 | 54    | 0.26%  | 10  | .    | .    | .    | .     | .    | .     | .     | D     | D     | K     | E     | N     | .     | .    | .    | .   | .    | .   | .    | .    |
| 35 | 52    | 0.25%  | 14  | .    | .    | K    | .     | .    | .     | .     | .     | .     | .     | .     | .     | .     | .    | .    | .   | .    | .   | .    | .    |
| 36 | 49    | 0.23%  | 14  | .    | .    | .    | .     | .    | .     | .     | .     | .     | .     | .     | Q     | .     | .    | .    | .   | .    | .   | .    | .    |
| 37 | 48    | 0.23%  | 14  | .    | .    | K    | .     | .    | I     | .     | .     | .     | E     | N     | .     | .     | .    | .    | .   | .    | L   | .    | .    |
| 38 | 42    | 0.20%  | 16  | .    | .    | K    | .     | .    | I     | .     | .     | .     | .     | .     | .     | .     | .    | .    | .   | .    | L   | .    | .    |
| 39 | 42    | 0.20%  | 12  | .    | .    | .    | .     | .    | .     | .     | D     | D     | .     | .     | .     | .     | .    | .    | P   | .    | .   | .    | .    |

eTable 4. Haplotype Frequencies Among Delta Viruses

Delta. Haplotype frequencies of core haplotypes associated with variant-specific polymutants, for those haplotypes with 0.1% haplotype frequency.

| ID | Count  | Freq   | Mut | A488 | P822 | P1228 | P1469 | A1711 | V167 | A446 | T492 | T77 | V149 | P323 | G671 | P77 | A394 | T19 | T95 | G142 | E156 | A222 | L452 | T478 | D614 | P681 | D950 | S26 | I82 | V82 | T120 | T40 | D63 | R203 | G215 | D377 |   |
|----|--------|--------|-----|------|------|-------|-------|-------|------|------|------|-----|------|------|------|-----|------|-----|-----|------|------|------|------|------|------|------|------|-----|-----|-----|------|-----|-----|------|------|------|---|
| 1  | 482881 | 22.55% | 27  | S    | P    | L     | S     | A     | L    | A    | I    | A   | V    | L    | S    | L   | V    | R   | T   | D    | G    | A    | R    | K    | G    | R    | N    | L   | T   | A   | I    | I   | G   | M    | C    | Y    |   |
| 2  | 276071 | 12.89% | 29  | .    | .    | .     | .     | V     | .    | .    | .    | .   | .    | .    | .    | .   | .    | .   | I   | .    | .    | .    | .    | .    | .    | .    | .    | .   | .   | .   | .    | .   | .   | .    | .    | .    | . |
| 3  | 233724 | 10.92% | 26  | .    | .    | .     | .     | .     | .    | .    | .    | .   | .    | .    | .    | .   | .    | .   | .   | G    | .    | .    | .    | .    | .    | .    | .    | .   | .   | .   | .    | .   | .   | .    | .    | .    | . |
| 4  | 205786 | 9.61%  | 28  | .    | .    | .     | .     | .     | .    | .    | .    | .   | .    | .    | .    | .   | .    | .   | .   | I    | .    | .    | .    | .    | .    | .    | .    | .   | .   | .   | .    | .   | .   | .    | .    | .    | . |
| 5  | 74239  | 3.47%  | 22  | A    | L    | P     | P     | .     | V    | V    | T    | T   | A    | .    | .    | .   | A    | .   | .   | .    | .    | V    | .    | .    | .    | .    | .    | .   | .   | .   | .    | T   | .   | .    | G    | .    |   |
| 6  | 64840  | 3.03%  | 27  | .    | .    | .     | .     | .     | .    | .    | .    | .   | .    | .    | .    | .   | .    | .   | .   | I    | G    | .    | .    | .    | .    | .    | .    | .   | .   | .   | .    | .   | .   | .    | .    | .    | . |
| 7  | 50506  | 2.36%  | 30  | .    | .    | .     | .     | V     | .    | .    | .    | .   | .    | .    | .    | .   | .    | .   | .   | I    | .    | V    | .    | .    | .    | .    | .    | .   | .   | .   | .    | .   | .   | .    | .    | .    | . |
| 8  | 37778  | 1.76%  | 28  | .    | .    | .     | .     | V     | .    | .    | .    | .   | .    | .    | .    | .   | .    | .   | .   | I    | G    | .    | .    | .    | .    | .    | .    | .   | .   | .   | .    | .   | .   | .    | .    | .    | . |
| 9  | 37472  | 1.75%  | 27  | .    | .    | .     | .     | V     | .    | .    | .    | .   | .    | .    | .    | .   | .    | .   | .   | .    | G    | .    | .    | .    | .    | .    | .    | .   | .   | .   | .    | .   | .   | .    | .    | .    | . |
| 10 | 33301  | 1.56%  | 21  | A    | L    | P     | P     | .     | V    | V    | T    | T   | A    | .    | .    | .   | A    | .   | .   | G    | .    | V    | .    | .    | .    | .    | .    | .   | .   | .   | .    | T   | .   | .    | G    | .    |   |
| 11 | 30783  | 1.44%  | 25  | .    | .    | .     | .     | .     | .    | .    | .    | .   | .    | .    | .    | .   | .    | .   | .   | .    | G    | E    | .    | .    | .    | .    | .    | .   | .   | .   | .    | .   | T   | .    | .    | G    | . |
| 12 | 15479  | 0.72%  | 21  | A    | L    | P     | P     | .     | V    | V    | T    | T   | A    | .    | .    | .   | A    | .   | .   | .    | .    | .    | .    | .    | .    | .    | .    | .   | .   | .   | .    | .   | T   | .    | .    | G    | . |
| 13 | 11681  | 0.55%  | 26  | .    | .    | P     | .     | .     | .    | .    | .    | .   | .    | .    | .    | .   | .    | .   | .   | .    | .    | .    | .    | .    | .    | .    | .    | .   | .   | .   | .    | .   | .   | .    | .    | .    | . |
| 14 | 10633  | 0.50%  | 25  | .    | .    | .     | .     | .     | .    | .    | .    | .   | .    | .    | .    | .   | .    | .   | .   | .    | G    | .    | .    | .    | .    | .    | .    | .   | D   | .   | .    | .   | .   | .    | .    | .    | . |
| 15 | 10548  | 0.49%  | 20  | A    | L    | P     | P     | .     | V    | V    | T    | T   | A    | .    | .    | .   | A    | .   | .   | G    | .    | .    | .    | .    | .    | .    | .    | .   | .   | .   | .    | T   | .   | .    | G    | .    |   |
| 16 | 10494  | 0.49%  | 26  | .    | .    | .     | .     | .     | .    | .    | .    | .   | .    | .    | .    | .   | .    | .   | .   | .    | E    | .    | .    | .    | .    | .    | .    | .   | .   | .   | .    | .   | .   | .    | .    | .    | . |
| 17 | 8398   | 0.39%  | 24  | .    | .    | .     | .     | .     | .    | .    | .    | .   | .    | .    | .    | .   | .    | .   | .   | .    | G    | .    | .    | .    | .    | .    | .    | .   | .   | .   | V    | T   | .   | .    | .    | .    | . |
| 18 | 7751   | 0.36%  | 24  | .    | .    | .     | .     | .     | .    | .    | .    | .   | .    | .    | .    | .   | .    | .   | .   | .    | G    | .    | .    | .    | .    | .    | .    | D   | .   | .   | .    | .   | D   | .    | .    | .    | . |
| 19 | 6618   | 0.31%  | 28  | .    | .    | .     | .     | V     | .    | .    | .    | .   | .    | .    | G    | .   | .    | .   | .   | I    | .    | .    | .    | .    | .    | .    | .    | .   | .   | .   | .    | .   | .   | .    | .    | .    | . |
| 20 | 6330   | 0.30%  | 25  | .    | .    | .     | .     | .     | .    | .    | .    | .   | .    | .    | .    | .   | .    | .   | .   | .    | .    | .    | .    | .    | .    | .    | .    | .   | .   | .   | V    | T   | .   | .    | .    | .    | . |
| 21 | 6227   | 0.29%  | 28  | .    | .    | .     | .     | .     | .    | .    | .    | .   | F    | .    | .    | .   | .    | .   | .   | .    | .    | .    | .    | .    | .    | .    | .    | .   | .   | .   | .    | .   | .   | .    | .    | .    | . |
| 22 | 6076   | 0.28%  | 27  | .    | .    | .     | .     | V     | .    | .    | .    | .   | .    | .    | .    | .   | .    | .   | .   | I    | .    | .    | .    | .    | .    | .    | .    | .   | .   | .   | V    | T   | .   | .    | .    | .    | . |
| 23 | 5657   | 0.26%  | 26  | .    | .    | .     | .     | V     | .    | .    | .    | .   | .    | .    | .    | .   | .    | .   | .   | .    | G    | E    | .    | .    | .    | .    | .    | .   | .   | .   | .    | .   | .   | .    | .    | .    | . |
| 24 | 5648   | 0.26%  | 23  | .    | .    | .     | .     | .     | .    | .    | .    | .   | .    | .    | .    | .   | .    | .   | .   | .    | G    | E    | .    | .    | .    | .    | .    | .   | .   | .   | V    | T   | .   | .    | .    | .    | . |
| 25 | 5640   | 0.26%  | 27  | .    | .    | .     | .     | .     | .    | .    | .    | .   | .    | .    | .    | .   | .    | .   | .   | .    | I    | .    | .    | .    | .    | .    | .    | .   | .   | .   | .    | V   | .   | .    | .    | .    | . |
| 26 | 5437   | 0.25%  | 27  | .    | .    | .     | .     | .     | .    | .    | .    | .   | .    | .    | .    | .   | .    | .   | .   | .    | I    | E    | .    | .    | .    | .    | .    | .   | .   | .   | .    | .   | .   | .    | .    | .    | . |
| 27 | 4911   | 0.23%  | 26  | .    | .    | .     | .     | .     | .    | .    | .    | .   | .    | .    | .    | .   | .    | .   | .   | .    | .    | .    | .    | .    | .    | .    | .    | .   | .   | .   | .    | .   | V   | .    | .    | .    | . |
| 28 | 4782   | 0.22%  | 28  | .    | .    | P     | .     | V     | .    | .    | .    | .   | .    | .    | .    | .   | .    | .   | .   | .    | I    | .    | .    | .    | .    | .    | .    | .   | .   | .   | .    | .   | .   | .    | .    | .    | . |
| 29 | 4736   | 0.22%  | 26  | .    | .    | .     | .     | .     | .    | .    | .    | .   | .    | .    | .    | .   | .    | .   | .   | .    | I    | G    | E    | .    | .    | .    | .    | .   | .   | .   | .    | .   | .   | .    | .    | .    | . |
| 30 | 4657   | 0.22%  | 26  | .    | .    | .     | P     | .     | .    | .    | .    | .   | .    | .    | .    | .   | .    | .   | .   | .    | .    | .    | .    | .    | .    | .    | .    | .   | .   | .   | .    | .   | .   | .    | .    | .    | . |
| 31 | 4533   | 0.21%  | 26  | .    | .    | .     | .     | .     | .    | .    | .    | .   | .    | .    | .    | .   | .    | .   | .   | .    | .    | .    | .    | .    | .    | .    | .    | D   | .   | .   | .    | .   | .   | .    | .    | .    | . |
| 32 | 4517   | 0.21%  | 25  | .    | .    | .     | .     | .     | .    | .    | .    | .   | .    | .    | .    | .   | .    | .   | .   | .    | G    | .    | .    | .    | .    | .    | .    | .   | .   | .   | .    | .   | .   | D    | .    | .    | . |
| 33 | 4437   | 0.21%  | 26  | .    | .    | .     | .     | .     | .    | .    | .    | .   | .    | .    | .    | .   | .    | .   | .   | .    | I    | G    | .    | .    | .    | .    | .    | D   | .   | .   | .    | .   | .   | .    | .    | .    | . |
| 34 | 4261   | 0.20%  | 28  | .    | .    | .     | .     | V     | .    | .    | .    | .   | .    | .    | .    | .   | .    | .   | .   | .    | I    | E    | .    | .    | .    | .    | .    | .   | .   | .   | .    | .   | .   | .    | .    | .    | . |
| 35 | 4184   | 0.20%  | 17  | A    | L    | P     | P     | .     | V    | .    | T    | T   | .    | .    | G    | P   | A    | .   | .   | .    | .    | .    | .    | .    | .    | .    | .    | .   | .   | .   | T    | .   | .   | G    | .    | .    |   |
| 36 | 4060   | 0.19%  | 27  | .    | .    | P     | .     | V     | .    | .    | .    | .   | .    | .    | G    | .   | .    | .   | .   | .    | I    | .    | .    | .    | .    | .    | .    | .   | .   | .   | .    | .   | .   | .    | .    | .    | . |
| 37 | 3911   | 0.18%  | 26  | .    | .    | .     | .     | V     | .    | .    | .    | .   | .    | .    | .    | .   | .    | .   | .   | .    | I    | .    | .    | .    | .    | .    | .    | .   | .   | .   | .    | V   | T   | T    | .    | .    | . |
| 38 | 3793   | 0.18%  | 19  | A    | L    | P     | P     | .     | V    | V    | T    | T   | A    | .    | .    | .   | A    | .   | .   | G    | E    | .    | .    | .    | .    | .    | .    | .   | .   | .   | .    | T   | .   | .    | G    | .    |   |
| 39 | 3778   | 0.18%  | 24  | .    | .    | .     | .     | .     | .    | .    | .    | .   | .    | .    | .    | .   | .    | .   | .   | .    | G    | .    | L    | T    | .    | .    | .    | .   | .   | .   | .    | .   | .   | .    | .    | .    | . |



eTable 5. Haplotype Frequencies Among Epsilon Viruses

Epsilon. Haplotype frequencies of core haplotypes associated with variant-specific polymutants, for those haplotypes with 0.1% haplotype frequency.

| ID | Count | Freq   | Mut | T85  | I65  | P323  | P53   | D260  | S13   | W152  | L452  | D614  | Q57 | A65 | V100 | T205 | M234 |
|----|-------|--------|-----|------|------|-------|-------|-------|-------|-------|-------|-------|-----|-----|------|------|------|
|    |       |        |     | NSP2 | NSP9 | NSP12 | NSP13 | NSP13 | Spike | Spike | Spike | Spike | NS3 | NS8 | NS8  | N    | N    |
| 1  | 11106 | 30.92% | 10  | I    | V    | L     | P     | Y     | I     | C     | R     | G     | H   | A   | V    | I    | M    |
| 2  | 7653  | 21.30% | 12  | .    | .    | .     | .     | .     | .     | .     | .     | .     | .   | .   | L    | .    | I    |
| 3  | 6205  | 17.27% | 10  | .    | I    | .     | L     | .     | .     | .     | .     | .     | .   | .   | .    | .    | .    |
| 4  | 2642  | 7.35%  | 11  | .    | I    | .     | L     | .     | .     | .     | .     | .     | .   | V   | .    | .    | .    |
| 5  | 716   | 1.99%  | 11  | .    | .    | .     | .     | .     | .     | .     | .     | .     | .   | .   | .    | .    | I    |
| 6  | 605   | 1.68%  | 9   | .    | .    | P     | .     | .     | .     | .     | .     | .     | .   | .   | .    | .    | .    |
| 7  | 497   | 1.38%  | 9   | .    | .    | .     | .     | .     | S     | .     | .     | .     | .   | .   | .    | .    | .    |
| 8  | 443   | 1.23%  | 10  | .    | I    | .     | L     | .     | .     | W     | .     | .     | .   | V   | .    | .    | .    |
| 9  | 321   | 0.89%  | 9   | .    | I    | .     | L     | .     | S     | .     | .     | .     | .   | .   | .    | .    | .    |
| 10 | 304   | 0.85%  | 11  | .    | .    | P     | .     | .     | .     | .     | .     | .     | .   | .   | L    | .    | I    |
| 11 | 272   | 0.76%  | 11  | .    | .    | .     | .     | .     | S     | .     | .     | .     | .   | .   | L    | .    | I    |
| 12 | 262   | 0.73%  | 9   | .    | I    | .     | .     | .     | .     | .     | .     | .     | .   | .   | .    | .    | .    |
| 13 | 256   | 0.71%  | 9   | .    | I    | P     | L     | .     | .     | .     | .     | .     | .   | .   | .    | .    | .    |
| 14 | 236   | 0.66%  | 9   | .    | .    | .     | .     | .     | .     | W     | .     | .     | .   | .   | .    | .    | .    |
| 15 | 169   | 0.47%  | 9   | .    | .    | .     | .     | .     | .     | .     | L     | .     | .   | .   | .    | .    | .    |
| 16 | 158   | 0.44%  | 11  | .    | .    | .     | .     | .     | .     | W     | .     | .     | .   | .   | L    | .    | I    |
| 17 | 148   | 0.41%  | 10  | .    | I    | P     | L     | .     | .     | .     | .     | .     | .   | V   | .    | .    | .    |
| 18 | 148   | 0.41%  | 8   | .    | I    | P     | .     | .     | .     | .     | .     | .     | .   | .   | .    | .    | .    |
| 19 | 141   | 0.39%  | 11  | .    | .    | .     | .     | .     | .     | .     | L     | .     | .   | .   | L    | .    | I    |
| 20 | 117   | 0.33%  | 11  | .    | .    | .     | .     | .     | .     | .     | .     | .     | .   | V   | .    | .    | .    |
| 21 | 108   | 0.30%  | 9   | .    | I    | .     | L     | .     | S     | W     | .     | .     | .   | V   | .    | .    | .    |
| 22 | 107   | 0.30%  | 9   | .    | .    | .     | .     | .     | .     | .     | .     | .     | .   | .   | .    | T    | .    |
| 23 | 98    | 0.27%  | 9   | .    | I    | .     | L     | .     | .     | W     | .     | .     | .   | .   | .    | .    | .    |
| 24 | 98    | 0.27%  | 8   | .    | .    | .     | .     | .     | S     | W     | .     | .     | .   | .   | .    | .    | .    |
| 25 | 82    | 0.23%  | 10  | .    | I    | .     | L     | .     | .     | .     | L     | .     | .   | V   | .    | .    | .    |
| 26 | 79    | 0.22%  | 11  | .    | I    | .     | .     | .     | .     | .     | .     | .     | .   | .   | L    | .    | I    |
| 27 | 78    | 0.22%  | 8   | .    | I    | .     | L     | .     | S     | W     | .     | .     | .   | .   | .    | .    | .    |
| 28 | 74    | 0.21%  | 8   | .    | .    | .     | .     | D     | S     | .     | .     | .     | .   | .   | .    | .    | .    |
| 29 | 71    | 0.20%  | 10  | .    | I    | P     | .     | .     | .     | .     | .     | .     | .   | .   | L    | .    | I    |
| 30 | 70    | 0.19%  | 10  | .    | I    | .     | L     | .     | S     | .     | .     | .     | .   | V   | .    | .    | .    |
| 31 | 64    | 0.18%  | 9   | .    | I    | .     | L     | .     | .     | .     | L     | .     | .   | .   | .    | .    | .    |
| 32 | 54    | 0.15%  | 9   | .    | I    | .     | L     | .     | .     | W     | L     | .     | .   | V   | .    | .    | .    |
| 33 | 52    | 0.14%  | 10  | .    | .    | .     | .     | .     | S     | W     | .     | .     | .   | .   | L    | .    | I    |
| 34 | 51    | 0.14%  | 9   | .    | .    | .     | .     | D     | .     | .     | .     | .     | .   | .   | .    | .    | .    |
| 35 | 46    | 0.13%  | 8   | .    | .    | .     | .     | .     | .     | W     | L     | .     | .   | .   | .    | .    | .    |
| 36 | 44    | 0.12%  | 8   | .    | I    | .     | .     | .     | S     | .     | .     | .     | .   | .   | .    | .    | .    |
| 37 | 41    | 0.11%  | 8   | .    | I    | .     | .     | .     | .     | .     | .     | .     | Q   | .   | .    | .    | .    |



eTable 7.Haplotype Frequencies Among Gamma Viruses

Gamma. Haplotype frequencies of core haplotypes associated with variant-specific polymutants, for those haplotypes with 0.1% haplotype frequency.

| ID | Freq  | %      | #  | NSP3<br>S370 | NSP3<br>K977 | NSP4<br>S184 | NSP12<br>P323 | NSP13<br>E341 | Spike<br>L18 | Spike<br>T20 | Spike<br>P26 | Spike<br>D138 | Spike<br>R190 | Spike<br>K417 | Spike<br>E484 | Spike<br>N501 | Spike<br>D614 | Spike<br>H655 | Spike<br>T1027 | Spike<br>V1176 | NS3<br>S253 | NS8<br>E92 | N<br>P80 | N<br>R203 | N<br>G204 |
|----|-------|--------|----|--------------|--------------|--------------|---------------|---------------|--------------|--------------|--------------|---------------|---------------|---------------|---------------|---------------|---------------|---------------|----------------|----------------|-------------|------------|----------|-----------|-----------|
| 1  | 36853 | 61.22% | 21 | L            | Q            | S            | L             | D             | F            | N            | S            | Y             | S             | T             | K             | Y             | G             | Y             | I              | F              | P           | K          | R        | K         | R         |
| 2  | 7567  | 12.57% | 22 | .            | .            | N            | .             | .             | .            | .            | .            | .             | .             | .             | .             | .             | .             | .             | .              | .              | .           | .          | .        | .         | .         |
| 3  | 1626  | 2.70%  | 20 | .            | .            | .            | .             | .             | .            | .            | .            | .             | R             | .             | .             | .             | .             | .             | .              | .              | .           | .          | .        | .         | .         |
| 4  | 1400  | 2.33%  | 19 | .            | .            | .            | .             | .             | .            | .            | .            | .             | .             | .             | .             | .             | .             | .             | .              | .              | .           | .          | .        | R         | G         |
| 5  | 1375  | 2.28%  | 20 | .            | .            | .            | .             | .             | .            | .            | .            | D             | .             | .             | .             | .             | .             | .             | .              | .              | .           | .          | .        | .         | .         |
| 6  | 1365  | 2.27%  | 20 | .            | .            | .            | .             | .             | .            | .            | .            | .             | .             | K             | .             | .             | .             | .             | .              | .              | .           | .          | .        | .         | .         |
| 7  | 1005  | 1.67%  | 19 | .            | .            | .            | .             | .             | .            | .            | .            | .             | .             | .             | E             | N             | .             | .             | .              | .              | .           | .          | .        | .         | .         |
| 8  | 324   | 0.54%  | 20 | .            | .            | .            | .             | .             | .            | .            | .            | .             | .             | .             | .             | .             | .             | .             | T              | .              | .           | .          | .        | .         | .         |
| 9  | 263   | 0.44%  | 20 | .            | .            | .            | .             | .             | .            | .            | .            | .             | .             | .             | .             | .             | .             | .             | .              | .              | .           | .          | .        | R         | .         |
| 10 | 259   | 0.43%  | 20 | .            | .            | N            | .             | .             | .            | .            | .            | .             | .             | .             | .             | .             | .             | .             | T              | V              | .           | .          | .        | .         | .         |
| 11 | 246   | 0.41%  | 18 | .            | .            | .            | .             | E             | .            | T            | .            | .             | .             | .             | .             | .             | .             | .             | .              | .              | .           | E          | .        | .         | .         |
| 12 | 230   | 0.38%  | 21 | .            | .            | N            | .             | .             | .            | .            | .            | D             | .             | .             | .             | .             | .             | .             | .              | .              | .           | .          | .        | .         | .         |
| 13 | 220   | 0.37%  | 21 | .            | .            | N            | .             | .             | .            | .            | .            | .             | .             | K             | .             | .             | .             | .             | .              | .              | .           | .          | .        | .         | .         |
| 14 | 205   | 0.34%  | 20 | .            | .            | .            | .             | .             | .            | .            | .            | .             | .             | .             | .             | .             | .             | .             | .              | .              | .           | E          | .        | .         | .         |
| 15 | 203   | 0.34%  | 21 | .            | .            | N            | .             | .             | .            | .            | .            | .             | .             | .             | .             | .             | .             | .             | T              | .              | .           | .          | .        | .         | .         |
| 16 | 181   | 0.30%  | 20 | S            | .            | .            | .             | .             | .            | .            | .            | .             | .             | .             | .             | .             | .             | .             | .              | .              | .           | .          | .        | .         | .         |
| 17 | 173   | 0.29%  | 17 | .            | .            | .            | .             | .             | .            | .            | .            | .             | .             | .             | E             | N             | .             | .             | .              | .              | .           | .          | .        | R         | G         |
| 18 | 166   | 0.28%  | 18 | .            | .            | .            | .             | .             | .            | .            | .            | .             | R             | .             | E             | N             | .             | .             | .              | .              | .           | .          | .        | .         | .         |
| 19 | 157   | 0.26%  | 20 | .            | .            | .            | .             | .             | .            | .            | .            | .             | .             | .             | E             | .             | .             | .             | .              | .              | .           | .          | .        | .         | .         |
| 20 | 137   | 0.23%  | 19 | .            | .            | .            | .             | .             | .            | .            | .            | .             | .             | .             | .             | .             | .             | .             | T              | V              | .           | .          | .        | .         | .         |
| 21 | 135   | 0.22%  | 20 | .            | .            | .            | .             | .             | .            | .            | .            | .             | .             | .             | .             | .             | .             | .             | .              | V              | .           | .          | .        | .         | .         |
| 22 | 133   | 0.22%  | 21 | .            | .            | .            | .             | .             | .            | .            | F            | .             | .             | .             | .             | .             | .             | .             | .              | .              | .           | .          | .        | .         | .         |
| 23 | 124   | 0.21%  | 20 | .            | .            | .            | .             | .             | .            | .            | .            | .             | .             | .             | .             | N             | .             | .             | .              | .              | .           | .          | .        | .         | .         |
| 24 | 122   | 0.20%  | 19 | .            | .            | .            | .             | .             | .            | .            | .            | .             | R             | K             | .             | .             | .             | .             | .              | .              | .           | .          | .        | .         | .         |
| 25 | 100   | 0.17%  | 16 | .            | .            | .            | .             | .             | L            | T            | P            | D             | R             | .             | .             | .             | .             | .             | .              | .              | .           | .          | .        | .         | .         |
| 26 | 91    | 0.15%  | 18 | .            | .            | .            | .             | .             | L            | T            | P            | .             | .             | .             | .             | .             | .             | .             | .              | .              | .           | .          | .        | .         | .         |
| 27 | 90    | 0.15%  | 20 | .            | K            | .            | .             | .             | .            | .            | .            | .             | .             | .             | .             | .             | .             | .             | .              | .              | .           | .          | .        | .         | .         |
| 28 | 90    | 0.15%  | 17 | .            | .            | .            | .             | .             | L            | T            | P            | .             | R             | .             | .             | .             | .             | .             | .              | .              | .           | .          | .        | .         | .         |
| 29 | 83    | 0.14%  | 18 | .            | .            | .            | .             | .             | .            | .            | .            | .             | R             | .             | .             | .             | .             | .             | .              | .              | .           | .          | .        | R         | G         |
| 30 | 72    | 0.12%  | 19 | .            | .            | .            | .             | .             | .            | .            | .            | D             | .             | K             | .             | .             | .             | .             | .              | .              | .           | .          | .        | .         | .         |
| 31 | 72    | 0.12%  | 20 | .            | .            | .            | .             | .             | .            | .            | .            | .             | .             | .             | .             | .             | .             | H             | .              | .              | .           | .          | .        | .         | .         |
| 32 | 68    | 0.11%  | 20 | .            | .            | .            | .             | E             | .            | .            | .            | .             | .             | .             | .             | .             | .             | .             | .              | .              | .           | .          | .        | .         | .         |
| 33 | 67    | 0.11%  | 20 | .            | .            | .            | .             | .             | .            | .            | .            | .             | .             | .             | .             | .             | .             | .             | .              | S              | .           | .          | .        | .         | .         |
| 34 | 66    | 0.11%  | 20 | .            | .            | .            | .             | .             | .            | .            | .            | .             | .             | .             | .             | .             | .             | .             | .              | .              | .           | .          | P        | .         | .         |
| 35 | 64    | 0.11%  | 20 | .            | .            | N            | .             | .             | .            | .            | .            | .             | .             | .             | E             | N             | .             | .             | .              | .              | .           | .          | .        | .         | .         |
| 36 | 62    | 0.10%  | 19 | .            | .            | .            | .             | .             | .            | .            | .            | D             | .             | .             | .             | .             | .             | .             | .              | .              | E           | .          | .        | .         | .         |

eTable 8. Haplotype Frequencies Among GH/490R Viruses

GH/490R. Haplotype frequencies of core haplotypes associated with variant-specific polymutants, for those haplotypes with 0.1% haplotype frequency.

| ID | Freq | %      | #  | P129 | NSP2 | NSP2  | NSP2  | NSP3 | NSP3 | NSP4 | NSP4 | NSP4 | NSP6 | NSP13 | NSP16 | Spike | Spike | Spike | Spike | Spike | Spike | Spike | NS3 | NS3 | N    | N |
|----|------|--------|----|------|------|-------|-------|------|------|------|------|------|------|-------|-------|-------|-------|-------|-------|-------|-------|-------|-----|-----|------|---|
|    |      |        |    | G221 | E272 | L1301 | A1537 | S386 | R401 | T492 | V149 | Q586 | R216 | P9    | E96   | R190  | I210  | Y449  | F490  | N501  | D936  | T32   | A54 | D22 | E378 |   |
| 1  | 78   | 18.10% | 20 | L    | G    | G     | F     | S    | F    | H    | I    | A    | Q    | R     | L     | Q     | S     | T     | N     | R     | Y     | H     | I   | S   | Y    | Q |
| 2  | 69   | 16.01% | 19 | .    | .    | .     | .     | .    | .    | .    | .    | .    | .    | .     | .     | .     | .     | .     | .     | .     | .     | .     | .   | A   | .    | . |
| 3  | 37   | 8.58%  | 21 | .    | S    | .     | .     | .    | .    | .    | .    | H    | H    | .     | .     | .     | .     | Y     | .     | .     | .     | .     | .   | A   | .    | . |
| 4  | 35   | 8.12%  | 22 | .    | S    | .     | .     | .    | .    | .    | .    | H    | H    | .     | .     | .     | .     | .     | .     | .     | .     | .     | .   | A   | .    | . |
| 5  | 22   | 5.10%  | 18 | .    | .    | .     | .     | .    | .    | .    | .    | .    | .    | .     | .     | .     | .     | .     | .     | .     | .     | .     | .   | A   | D    | . |
| 6  | 17   | 3.94%  | 18 | .    | .    | .     | .     | .    | .    | .    | .    | .    | .    | .     | .     | .     | .     | Y     | .     | .     | .     | .     | .   | A   | .    | . |
| 7  | 13   | 3.02%  | 19 | .    | .    | .     | .     | .    | .    | .    | .    | .    | .    | .     | .     | .     | .     | Y     | .     | .     | .     | .     | .   | .   | .    | . |
| 8  | 12   | 2.78%  | 18 | .    | .    | .     | .     | .    | .    | .    | .    | .    | .    | .     | .     | R     | I     | .     | .     | .     | .     | .     | .   | .   | .    | . |
| 9  | 10   | 2.32%  | 9  | .    | .    | E     | L     | A    | S    | R    | T    | V    | .    | .     | .     | .     | I     | .     | S     | .     | D     | .     | A   | .   | E    |   |
| 10 | 9    | 2.09%  | 15 | .    | .    | .     | .     | .    | .    | .    | .    | .    | .    | .     | E     | R     | I     | .     | .     | .     | .     | .     | .   | A   | D    | . |
| 11 | 7    | 1.62%  | 17 | .    | .    | .     | .     | .    | .    | .    | .    | .    | .    | .     | .     | R     | I     | .     | .     | .     | .     | .     | .   | A   | .    | . |
| 12 | 6    | 1.39%  | 20 | .    | .    | .     | .     | .    | .    | .    | .    | .    | .    | .     | .     | .     | .     | .     | .     | .     | .     | .     | .   | V   | .    | . |
| 13 | 5    | 1.16%  | 8  | .    | .    | E     | L     | A    | S    | R    | T    | V    | .    | .     | .     | .     | I     | Y     | S     | .     | D     | .     | A   | .   | E    |   |
| 14 | 5    | 1.16%  | 16 | .    | .    | .     | .     | A    | .    | .    | .    | .    | .    | .     | .     | R     | I     | .     | .     | .     | .     | .     | .   | A   | .    | . |
| 15 | 5    | 1.16%  | 19 | .    | .    | .     | .     | S    | .    | .    | .    | .    | .    | .     | .     | .     | .     | .     | .     | .     | Y     | .     | .   | .   | .    | . |
| 16 | 4    | 0.93%  | 8  | .    | .    | E     | L     | A    | S    | R    | T    | V    | .    | .     | .     | R     | I     | .     | S     | .     | D     | .     | A   | .   | E    |   |
| 17 | 4    | 0.93%  | 10 | .    | .    | E     | L     | A    | S    | R    | T    | V    | .    | .     | .     | .     | I     | .     | S     | .     | D     | .     | .   | .   | E    |   |
| 18 | 4    | 0.93%  | 18 | .    | .    | .     | .     | A    | .    | .    | .    | .    | .    | .     | .     | .     | .     | .     | .     | .     | .     | .     | .   | A   | .    | . |
| 19 | 4    | 0.93%  | 19 | .    | .    | .     | .     | A    | .    | .    | .    | .    | .    | .     | .     | .     | .     | .     | .     | .     | .     | .     | .   | .   | .    | . |
| 20 | 4    | 0.93%  | 18 | .    | .    | .     | .     | .    | .    | .    | .    | .    | .    | .     | .     | R     | .     | .     | .     | .     | .     | .     | .   | A   | .    | . |
| 21 | 4    | 0.93%  | 21 | .    | S    | .     | .     | .    | .    | .    | .    | H    | H    | .     | .     | R     | .     | .     | .     | .     | .     | .     | .   | A   | .    | . |
| 22 | 3    | 0.70%  | 9  | .    | .    | E     | L     | A    | S    | R    | T    | V    | .    | .     | .     | R     | I     | .     | S     | .     | D     | .     | .   | .   | E    |   |
| 23 | 3    | 0.70%  | 16 | .    | .    | .     | .     | .    | .    | .    | .    | .    | .    | .     | E     | R     | I     | .     | .     | .     | .     | .     | .   | .   | D    | . |
| 24 | 3    | 0.70%  | 19 | .    | .    | .     | .     | S    | .    | .    | .    | .    | .    | .     | .     | .     | .     | .     | .     | .     | .     | .     | .   | .   | .    | . |
| 25 | 3    | 0.70%  | 18 | .    | .    | .     | L     | A    | .    | .    | .    | H    | H    | .     | .     | .     | .     | Y     | .     | .     | .     | .     | .   | A   | .    | . |
| 26 | 3    | 0.70%  | 20 | .    | S    | .     | .     | .    | .    | .    | .    | H    | H    | .     | .     | R     | I     | .     | .     | .     | .     | .     | .   | A   | .    | . |
| 27 | 2    | 0.46%  | 5  | .    | .    | E     | L     | A    | S    | R    | T    | V    | .    | .     | E     | R     | I     | .     | S     | .     | D     | T     | A   | D   | E    |   |
| 28 | 2    | 0.46%  | 17 | .    | .    | .     | .     | .    | .    | .    | .    | .    | .    | .     | E     | .     | .     | .     | .     | .     | .     | .     | .   | A   | D    | . |
| 29 | 2    | 0.46%  | 19 | .    | .    | .     | .     | .    | .    | .    | .    | .    | .    | .     | .     | .     | .     | .     | .     | .     | .     | .     | .   | .   | D    | . |
| 30 | 2    | 0.46%  | 17 | .    | .    | .     | L     | A    | .    | .    | .    | .    | .    | .     | .     | .     | .     | .     | .     | .     | .     | .     | .   | A   | .    | . |
| 31 | 2    | 0.46%  | 17 | .    | S    | .     | .     | .    | .    | .    | .    | H    | H    | .     | .     | R     | I     | Y     | F     | N     | .     | .     | .   | A   | .    | . |
| 32 | 2    | 0.46%  | 17 | P    | .    | .     | .     | .    | .    | .    | .    | .    | .    | .     | .     | .     | .     | .     | .     | .     | .     | .     | .   | A   | D    | . |
| 33 | 1    | 0.23%  | 7  | .    | .    | E     | L     | A    | S    | R    | T    | V    | .    | P     | .     | R     | I     | .     | S     | .     | D     | .     | A   | .   | E    |   |
| 34 | 1    | 0.23%  | 15 | .    | .    | E     | L     | .    | .    | .    | .    | .    | .    | .     | .     | .     | .     | Y     | .     | .     | .     | .     | .   | A   | .    | E |
| 35 | 1    | 0.23%  | 14 | .    | .    | .     | .     | A    | .    | .    | .    | .    | .    | E     | R     | I     | .     | .     | .     | .     | .     | .     | .   | A   | D    | . |
| 36 | 1    | 0.23%  | 14 | .    | .    | .     | .     | A    | .    | .    | .    | .    | .    | .     | .     | R     | I     | .     | .     | .     | .     | .     | .   | A   | D    | E |
| 37 | 1    | 0.23%  | 17 | .    | .    | .     | .     | A    | .    | .    | .    | .    | .    | .     | .     | R     | I     | .     | .     | .     | .     | .     | .   | .   | .    | . |
| 38 | 1    | 0.23%  | 17 | .    | .    | .     | .     | A    | .    | .    | .    | .    | .    | .     | .     | .     | I     | .     | .     | .     | .     | .     | .   | A   | .    | . |
| 39 | 1    | 0.23%  | 18 | .    | .    | .     | .     | A    | .    | .    | .    | .    | .    | .     | .     | .     | .     | .     | .     | .     | .     | .     | .   | .   | .    | E |
| 40 | 1    | 0.23%  | 17 | .    | .    | .     | .     | A    | .    | .    | .    | .    | .    | .     | .     | .     | .     | Y     | .     | .     | .     | .     | .   | A   | .    | . |

eTable 9. Haplotype Frequencies Among Iota Viruses

Iota. Haplotype frequencies of core haplotypes associated with variant-specific polymutants, for those haplotypes with 0.1% haplotype frequency.

| ID | Freq  | %      | #  | NSP2 | NSP4 | NSP12 | NSP13 | Spike | Spike | Spike | Spike | Spike | Spike | Spike | Spike | NS3 | NS3 | NS7a | NS8 | N   | N    | N    | N    |
|----|-------|--------|----|------|------|-------|-------|-------|-------|-------|-------|-------|-------|-------|-------|-----|-----|------|-----|-----|------|------|------|
|    |       |        |    | T85  | L438 | P323  | Q88   | L5    | T95   | D253  | S477  | E484  | D614  | A701  | Q957  | P42 | Q57 | L116 | T11 | P13 | P199 | S202 | M234 |
| 1  | 10264 | 47.21% | 15 | I    | P    | L     | H     | F     | I     | G     | S     | K     | G     | V     | Q     | L   | H   | L    | I   | P   | L    | S    | I    |
| 2  | 5329  | 24.51% | 16 | .    | .    | .     | .     | .     | .     | .     | N     | E     | .     | A     | R     | .   | .   | F    | .   | L   | P    | R    | M    |
| 3  | 1395  | 6.42%  | 15 | .    | .    | .     | .     | .     | .     | .     | N     | E     | .     | .     | .     | .   | .   | .    | .   | .   | .    | .    | .    |
| 4  | 902   | 4.15%  | 14 | .    | .    | .     | .     | .     | .     | .     | .     | E     | .     | .     | .     | .   | .   | .    | .   | .   | .    | .    | .    |
| 5  | 296   | 1.36%  | 15 | .    | .    | .     | .     | .     | .     | .     | N     | E     | .     | A     | R     | .   | .   | .    | .   | L   | P    | R    | M    |
| 6  | 279   | 1.28%  | 14 | .    | .    | .     | .     | .     | .     | .     | .     | .     | .     | A     | .     | .   | .   | .    | .   | .   | .    | .    | .    |
| 7  | 178   | 0.82%  | 14 | .    | .    | .     | .     | L     | .     | .     | .     | .     | .     | .     | .     | .   | .   | .    | .   | .   | .    | .    | .    |
| 8  | 152   | 0.70%  | 15 | .    | .    | .     | .     | .     | .     | .     | N     | E     | .     | A     | .     | .   | .   | F    | .   | L   | P    | R    | M    |
| 9  | 105   | 0.48%  | 14 | .    | .    | .     | .     | .     | .     | .     | .     | .     | .     | .     | P     | .   | .   | .    | .   | .   | .    | .    | .    |
| 10 | 101   | 0.46%  | 14 | .    | .    | .     | Q     | .     | .     | .     | .     | .     | .     | .     | .     | .   | .   | .    | .   | .   | .    | .    | .    |
| 11 | 87    | 0.40%  | 14 | .    | .    | .     | .     | .     | .     | .     | .     | .     | .     | .     | .     | .   | .   | .    | T   | .   | .    | .    | .    |
| 12 | 84    | 0.39%  | 14 | .    | .    | .     | .     | .     | .     | D     | .     | .     | .     | .     | .     | .   | .   | .    | .   | .   | .    | .    | .    |
| 13 | 83    | 0.38%  | 14 | .    | .    | .     | .     | .     | .     | .     | N     | E     | .     | A     | .     | .   | .   | .    | .   | .   | .    | .    | .    |
| 14 | 77    | 0.35%  | 13 | .    | .    | .     | .     | .     | .     | .     | .     | .     | .     | A     | .     | .   | .   | T    | .   | .   | .    | .    | .    |
| 15 | 74    | 0.34%  | 15 | .    | .    | .     | .     | .     | .     | .     | E     | .     | A     | R     | .     | .   | F   | .    | L   | P   | R    | M    |      |
| 16 | 72    | 0.33%  | 15 | .    | .    | .     | L     | .     | .     | N     | E     | .     | A     | R     | .     | .   | F   | .    | L   | P   | R    | M    |      |
| 17 | 55    | 0.25%  | 13 | .    | .    | .     | .     | .     | .     | N     | E     | .     | A     | .     | .     | .   | F   | T    | .   | P   | R    | M    |      |
| 18 | 53    | 0.24%  | 13 | .    | .    | P     | .     | .     | .     | .     | .     | .     | .     | A     | .     | .   | .   | .    | .   | .   | .    | .    | .    |
| 19 | 49    | 0.23%  | 13 | .    | .    | .     | L     | .     | .     | .     | E     | .     | .     | .     | .     | .   | .   | .    | .   | .   | .    | .    | .    |
| 20 | 46    | 0.21%  | 15 | .    | .    | .     | Q     | .     | .     | N     | E     | .     | A     | R     | .     | .   | F   | .    | L   | P   | R    | M    |      |
| 21 | 43    | 0.20%  | 15 | .    | .    | .     | .     | .     | .     | N     | E     | .     | A     | R     | P     | .   | F   | .    | L   | P   | R    | M    |      |
| 22 | 43    | 0.20%  | 16 | .    | .    | .     | .     | .     | .     | .     | .     | .     | .     | .     | .     | .   | F   | .    | .   | .   | .    | .    | .    |
| 23 | 41    | 0.19%  | 14 | .    | .    | .     | L     | .     | .     | N     | E     | .     | A     | R     | .     | .   | .   | .    | L   | P   | R    | M    |      |
| 24 | 38    | 0.17%  | 14 | .    | .    | .     | .     | .     | .     | .     | E     | .     | A     | R     | .     | .   | .   | .    | L   | P   | R    | M    |      |
| 25 | 37    | 0.17%  | 13 | .    | .    | .     | .     | .     | .     | .     | .     | .     | .     | .     | .     | .   | .   | .    | .   | P   | .    | M    | .    |
| 26 | 36    | 0.17%  | 16 | .    | .    | .     | .     | .     | .     | .     | .     | .     | .     | .     | .     | .   | .   | .    | L   | .   | .    | .    | .    |
| 27 | 33    | 0.15%  | 15 | .    | .    | .     | .     | .     | .     | D     | N     | E     | .     | A     | R     | .   | .   | F    | .   | L   | P    | R    | M    |
| 28 | 29    | 0.13%  | 14 | .    | L    | .     | .     | .     | .     | .     | .     | .     | .     | .     | .     | .   | .   | .    | .   | .   | .    | .    | .    |
| 29 | 29    | 0.13%  | 14 | .    | .    | P     | .     | .     | .     | .     | .     | .     | .     | .     | .     | .   | .   | .    | .   | .   | .    | .    | .    |
| 30 | 28    | 0.13%  | 15 | .    | .    | .     | .     | .     | .     | N     | E     | .     | A     | R     | .     | .   | F   | T    | L   | P   | R    | M    |      |
| 31 | 26    | 0.12%  | 13 | .    | .    | .     | .     | .     | .     | .     | E     | .     | A     | .     | .     | .   | .   | .    | .   | .   | .    | .    | .    |
| 32 | 26    | 0.12%  | 13 | .    | .    | .     | Q     | L     | .     | .     | .     | .     | .     | .     | .     | .   | .   | .    | .   | .   | .    | .    | .    |
| 33 | 24    | 0.11%  | 13 | .    | .    | .     | .     | .     | .     | D     | .     | E     | .     | .     | .     | .   | .   | .    | .   | .   | .    | .    | .    |
| 34 | 24    | 0.11%  | 13 | .    | .    | .     | .     | .     | .     | .     | N     | E     | .     | A     | .     | .   | .   | T    | .   | .   | .    | .    | .    |
| 35 | 24    | 0.11%  | 13 | .    | .    | .     | L     | .     | .     | .     | .     | .     | .     | .     | .     | .   | .   | T    | .   | .   | .    | .    | .    |

eTable 10. Haplotype Frequencies Among Kappa Viruses

Kappa. Haplotype frequencies of core haplotypes associated with variant-specific polymutants, for those haplotypes with 0.1% haplotype frequency.

| ID | Freq | %      | #  | NSP3 | NSP6 | NSP12 | NSP13 | NSP13 | NSP15 | NSP15 | NSP15 | Spike | Spike | Spike | Spike | Spike | Spike | Spike | Spike | NS3   | M   | NS7a | NS8 | N   | N  | N    |      |
|----|------|--------|----|------|------|-------|-------|-------|-------|-------|-------|-------|-------|-------|-------|-------|-------|-------|-------|-------|-----|------|-----|-----|----|------|------|
|    |      |        |    | T749 | T77  | P323  | G206  | M429  | P65   | K259  | S261  | T95   | G142  | E154  | L452  | E484  | D614  | P681  | Q1071 | H1101 | S26 | I82  | V82 | S69 | D3 | R203 | D377 |
| 1  | 679  | 17.36% | 20 | I    | A    | L     | C     | I     | P     | R     | A     | I     | D     | K     | R     | Q     | G     | R     | H     | H     | L   | S    | A   | S   | D  | M    | Y    |
| 2  | 228  | 5.83%  | 21 | .    | .    | .     | .     | .     | S     | .     | .     | .     | .     | .     | .     | .     | .     | .     | .     | .     | .   | .    | .   | .   | .  | .    | .    |
| 3  | 165  | 4.22%  | 19 | .    | .    | G     | .     | .     | .     | .     | S     | T     | .     | .     | .     | .     | .     | .     | .     | D     | .   | I    | .   | L   | Y  | .    | .    |
| 4  | 145  | 3.71%  | 18 | .    | .    | G     | .     | .     | .     | .     | S     | T     | .     | .     | .     | .     | .     | .     | .     | D     | .   | I    | .   | L   | .  | .    | .    |
| 5  | 126  | 3.22%  | 18 | .    | .    | .     | .     | .     | .     | .     | .     | .     | G     | .     | .     | .     | .     | .     | Q     | .     | .   | .    | .   | .   | .  | .    | .    |
| 6  | 96   | 2.45%  | 15 | .    | .    | G     | .     | .     | .     | .     | S     | T     | G     | .     | .     | .     | .     | .     | Q     | D     | .   | I    | .   | .   | .  | .    | .    |
| 7  | 89   | 2.28%  | 19 | .    | .    | .     | .     | .     | .     | .     | .     | .     | .     | E     | .     | .     | .     | .     | .     | .     | .   | .    | .   | .   | .  | .    | .    |
| 8  | 78   | 1.99%  | 18 | .    | .    | .     | .     | .     | .     | .     | .     | .     | G     | E     | .     | .     | .     | .     | .     | .     | .   | .    | .   | .   | .  | .    | .    |
| 9  | 65   | 1.66%  | 19 | .    | .    | .     | .     | .     | .     | .     | .     | .     | G     | .     | .     | .     | .     | .     | .     | .     | .   | .    | .   | .   | .  | .    | .    |
| 10 | 65   | 1.66%  | 17 | .    | .    | G     | .     | .     | .     | .     | S     | T     | .     | .     | .     | .     | .     | .     | .     | D     | .   | I    | .   | .   | .  | .    | .    |
| 11 | 57   | 1.46%  | 17 | .    | .    | .     | .     | .     | .     | .     | .     | T     | G     | E     | .     | .     | .     | .     | .     | .     | .   | .    | .   | .   | .  | .    | .    |
| 12 | 57   | 1.46%  | 17 | .    | .    | G     | .     | .     | .     | .     | .     | T     | .     | .     | .     | .     | .     | .     | .     | .     | .   | I    | .   | .   | .  | .    | .    |
| 13 | 49   | 1.25%  | 16 | .    | .    | G     | .     | .     | .     | .     | S     | T     | G     | .     | .     | .     | .     | .     | Q     | D     | .   | I    | .   | .   | Y  | .    | .    |
| 14 | 40   | 1.02%  | 15 | .    | .    | G     | .     | .     | .     | .     | .     | T     | G     | E     | .     | .     | .     | .     | .     | .     | .   | .    | I   | .   | .  | .    | .    |
| 15 | 38   | 0.97%  | 14 | .    | .    | G     | .     | .     | .     | .     | S     | T     | G     | E     | .     | .     | .     | .     | Q     | D     | .   | I    | .   | .   | .  | .    | .    |
| 16 | 37   | 0.95%  | 18 | .    | .    | .     | .     | .     | .     | .     | .     | T     | G     | .     | .     | .     | .     | .     | .     | .     | .   | .    | .   | .   | .  | .    | .    |
| 17 | 34   | 0.87%  | 18 | .    | .    | G     | .     | .     | .     | .     | S     | T     | .     | .     | .     | .     | .     | .     | .     | Y     | .   | I    | .   | L   | .  | .    | .    |
| 18 | 34   | 0.87%  | 16 | .    | .    | G     | .     | .     | .     | .     | S     | T     | G     | E     | .     | .     | .     | .     | .     | D     | .   | I    | .   | L   | .  | .    | .    |
| 19 | 34   | 0.87%  | 18 | .    | .    | G     | .     | .     | .     | .     | S     | T     | G     | .     | .     | .     | .     | .     | .     | D     | .   | I    | .   | L   | Y  | .    | .    |
| 20 | 33   | 0.84%  | 15 | .    | .    | G     | .     | .     | .     | .     | .     | T     | G     | .     | .     | .     | .     | .     | Q     | .     | .   | I    | .   | .   | .  | .    | .    |
| 21 | 32   | 0.82%  | 16 | .    | .    | G     | .     | .     | .     | .     | S     | T     | G     | .     | .     | .     | .     | .     | .     | D     | .   | I    | .   | .   | .  | .    | .    |
| 22 | 29   | 0.74%  | 18 | .    | .    | G     | .     | .     | .     | .     | S     | T     | .     | E     | .     | .     | .     | .     | .     | D     | .   | I    | .   | L   | Y  | .    | .    |
| 23 | 26   | 0.66%  | 15 | .    | .    | G     | .     | .     | .     | .     | S     | T     | G     | E     | .     | .     | .     | .     | .     | D     | .   | I    | .   | .   | .  | .    | .    |
| 24 | 23   | 0.59%  | 17 | .    | .    | G     | .     | .     | .     | .     | S     | T     | G     | .     | .     | .     | .     | .     | .     | D     | .   | I    | .   | L   | .  | .    | .    |
| 25 | 23   | 0.59%  | 19 | T    | .    | .     | .     | .     | .     | .     | .     | .     | .     | .     | .     | .     | .     | .     | .     | .     | .   | .    | .   | .   | .  | .    | .    |
| 26 | 22   | 0.56%  | 17 | .    | .    | .     | .     | .     | .     | .     | .     | .     | G     | E     | .     | .     | .     | .     | Q     | .     | .   | .    | .   | .   | .  | .    | .    |
| 27 | 22   | 0.56%  | 20 | .    | .    | .     | .     | S     | .     | .     | .     | .     | .     | E     | .     | .     | .     | .     | .     | .     | .   | .    | .   | .   | .  | .    | .    |
| 28 | 21   | 0.54%  | 14 | .    | .    | G     | .     | .     | .     | .     | .     | T     | G     | E     | .     | .     | .     | .     | Q     | .     | .   | I    | .   | .   | .  | .    | .    |
| 29 | 21   | 0.54%  | 16 | .    | .    | G     | .     | .     | .     | .     | .     | T     | G     | .     | .     | .     | .     | .     | .     | .     | .   | I    | .   | .   | .  | .    | .    |
| 30 | 21   | 0.54%  | 17 | .    | .    | G     | .     | .     | .     | .     | S     | T     | G     | E     | .     | .     | .     | .     | .     | D     | .   | I    | .   | L   | Y  | .    | .    |
| 31 | 20   | 0.51%  | 16 | .    | .    | G     | .     | .     | .     | .     | S     | T     | G     | E     | .     | .     | .     | .     | .     | D     | .   | I    | .   | .   | Y  | .    | .    |
| 32 | 18   | 0.46%  | 19 | .    | .    | .     | .     | .     | .     | .     | .     | .     | V     | S     | .     | .     | .     | .     | Q     | .     | .   | .    | .   | .   | .  | .    | .    |
| 33 | 18   | 0.46%  | 19 | .    | .    | .     | .     | S     | .     | .     | .     | .     | G     | E     | .     | .     | .     | .     | .     | .     | .   | .    | .   | .   | .  | .    | .    |
| 34 | 18   | 0.46%  | 20 | .    | .    | .     | .     | S     | .     | .     | .     | .     | G     | .     | .     | .     | .     | .     | .     | .     | .   | .    | .   | .   | .  | .    | .    |
| 35 | 18   | 0.46%  | 20 | T    | .    | .     | .     | S     | .     | .     | .     | .     | .     | .     | .     | .     | .     | .     | .     | .     | .   | .    | .   | .   | .  | .    | .    |
| 36 | 17   | 0.43%  | 19 | .    | .    | .     | .     | .     | .     | .     | .     | .     | .     | .     | .     | .     | .     | .     | .     | .     | .   | V    | .   | .   | .  | .    | .    |
| 37 | 17   | 0.43%  | 19 | .    | .    | .     | .     | .     | .     | .     | .     | .     | .     | .     | .     | .     | .     | .     | Q     | .     | .   | .    | .   | .   | .  | .    | .    |
| 38 | 16   | 0.41%  | 17 | .    | .    | G     | .     | .     | .     | .     | S     | T     | .     | E     | .     | .     | .     | .     | .     | D     | .   | I    | .   | L   | .  | .    | .    |
| 39 | 15   | 0.38%  | 16 | .    | .    | .     | .     | .     | .     | .     | .     | T     | G     | E     | .     | .     | .     | .     | Q     | .     | .   | .    | .   | .   | .  | .    | .    |
| 40 | 15   | 0.38%  | 17 | .    | .    | G     | .     | .     | .     | .     | S     | T     | G     | .     | .     | .     | .     | .     | .     | D     | .   | I    | .   | .   | Y  | .    | .    |

eTable 11. Haplotype Frequencies Among Lambda Viruses Lambda

Haplotype frequencies of core haplotypes associated with variant-specific polymutants, for those haplotypes with 0.1% haplotype frequency.

| ID | Freq | %      | #  | NSP3 | NSP3  | NSP3  | NSP4 | NSP4 | NSP5 | NSP12 | Spike | Spike | Spike | Spike | Spike | Spike | NS3  | N    | N   | N    | N    | N    |      |
|----|------|--------|----|------|-------|-------|------|------|------|-------|-------|-------|-------|-------|-------|-------|------|------|-----|------|------|------|------|
|    |      |        |    | T428 | P1469 | F1569 | L438 | T492 | G15  | P323  | G75   | T76   | D253  | L452  | F490  | D614  | T859 | A110 | P13 | A119 | R203 | G204 | G214 |
| 1  | 2885 | 56.57% | 18 | I    | S     | V     | P    | I    | S    | L     | V     | I     | N     | Q     | S     | G     | N    | A    | L   | A    | K    | R    | C    |
| 2  | 472  | 9.25%  | 17 | .    | .     | .     | .    | .    | .    | .     | .     | .     | D     | .     | .     | .     | .    | .    | .   | .    | .    | .    | .    |
| 3  | 401  | 7.86%  | 17 | .    | .     | .     | .    | .    | G    | .     | .     | .     | .     | .     | .     | .     | .    | .    | .   | .    | .    | .    | .    |
| 4  | 323  | 6.33%  | 20 | .    | .     | .     | .    | .    | .    | .     | .     | .     | .     | .     | .     | .     | .    | S    | .   | P    | .    | .    | .    |
| 5  | 137  | 2.69%  | 16 | .    | .     | .     | .    | .    | .    | .     | G     | T     | .     | .     | .     | .     | .    | .    | .   | .    | .    | .    | .    |
| 6  | 104  | 2.04%  | 19 | .    | .     | .     | .    | .    | .    | .     | .     | .     | D     | .     | .     | .     | .    | S    | .   | P    | .    | .    | .    |
| 7  | 54   | 1.06%  | 19 | .    | .     | .     | .    | .    | .    | .     | .     | .     | .     | .     | .     | .     | .    | .    | .   | P    | .    | .    | .    |
| 8  | 40   | 0.78%  | 16 | .    | .     | .     | .    | .    | G    | .     | .     | .     | D     | .     | .     | .     | .    | .    | .   | .    | .    | .    | .    |
| 9  | 36   | 0.71%  | 15 | .    | .     | .     | .    | .    | .    | .     | G     | T     | D     | .     | .     | .     | .    | .    | .   | .    | .    | .    | .    |
| 10 | 30   | 0.59%  | 17 | .    | .     | .     | .    | .    | .    | .     | .     | .     | .     | .     | .     | .     | .    | .    | P   | .    | .    | .    | .    |
| 11 | 27   | 0.53%  | 15 | .    | .     | .     | .    | .    | .    | .     | .     | .     | D     | .     | .     | .     | .    | .    | .   | .    | R    | G    | .    |
| 12 | 23   | 0.45%  | 16 | .    | P     | .     | .    | .    | .    | .     | .     | .     | D     | .     | .     | .     | .    | .    | .   | .    | .    | .    | .    |
| 13 | 23   | 0.45%  | 18 | .    | .     | .     | .    | .    | .    | .     | .     | .     | D     | .     | .     | .     | .    | .    | .   | P    | .    | .    | .    |
| 14 | 23   | 0.45%  | 16 | .    | .     | .     | .    | .    | .    | .     | .     | .     | .     | .     | .     | .     | .    | .    | .   | .    | R    | G    | .    |
| 15 | 20   | 0.39%  | 18 | .    | .     | .     | .    | .    | .    | .     | .     | .     | .     | .     | .     | .     | .    | .    | .   | .    | .    | .    | S    |
| 16 | 18   | 0.35%  | 15 | .    | .     | .     | .    | .    | G    | .     | G     | T     | .     | .     | .     | .     | .    | .    | .   | .    | .    | .    | .    |
| 17 | 17   | 0.33%  | 17 | .    | .     | .     | .    | .    | .    | .     | .     | .     | .     | .     | .     | .     | .    | .    | .   | .    | R    | .    | .    |
| 18 | 17   | 0.33%  | 17 | .    | .     | .     | .    | .    | .    | .     | .     | .     | .     | .     | .     | .     | T    | .    | .   | .    | .    | .    | .    |
| 19 | 12   | 0.24%  | 17 | .    | P     | .     | .    | .    | .    | .     | .     | .     | .     | .     | .     | .     | .    | .    | .   | .    | .    | .    | .    |
| 20 | 11   | 0.22%  | 17 | .    | .     | .     | .    | .    | .    | .     | .     | .     | .     | .     | F     | .     | .    | .    | .   | .    | .    | .    | .    |
| 21 | 11   | 0.22%  | 18 | .    | .     | .     | .    | .    | .    | .     | .     | .     | .     | .     | .     | .     | .    | .    | F   | .    | .    | .    | .    |
| 22 | 10   | 0.20%  | 14 | .    | .     | .     | .    | .    | G    | .     | G     | T     | D     | .     | .     | .     | .    | .    | .   | .    | .    | .    | .    |
| 23 | 9    | 0.18%  | 16 | .    | .     | .     | .    | .    | .    | .     | .     | .     | .     | L     | F     | .     | .    | .    | .   | .    | .    | .    | .    |
| 24 | 7    | 0.14%  | 14 | .    | P     | .     | .    | .    | .    | .     | .     | .     | D     | L     | F     | .     | .    | .    | .   | .    | .    | .    | .    |
| 25 | 7    | 0.14%  | 19 | .    | .     | .     | .    | .    | G    | .     | .     | .     | .     | .     | .     | .     | S    | .    | P   | .    | .    | .    | .    |
| 26 | 7    | 0.14%  | 17 | .    | .     | .     | .    | .    | .    | .     | G     | .     | .     | .     | .     | .     | .    | .    | .   | .    | .    | .    | .    |
| 27 | 6    | 0.12%  | 15 | .    | P     | .     | .    | .    | .    | .     | .     | .     | .     | L     | F     | .     | .    | .    | .   | .    | .    | .    | .    |
| 28 | 6    | 0.12%  | 17 | .    | .     | .     | .    | .    | .    | .     | .     | .     | D     | .     | .     | .     | .    | .    | .   | .    | .    | .    | S    |
| 29 | 6    | 0.12%  | 14 | .    | .     | .     | .    | .    | .    | .     | .     | .     | D     | .     | .     | .     | .    | .    | .   | .    | R    | G    | G    |
| 30 | 6    | 0.12%  | 19 | .    | .     | .     | .    | .    | .    | .     | .     | .     | .     | .     | .     | .     | .    | .    | S   | .    | .    | .    | .    |
| 31 | 6    | 0.12%  | 19 | .    | .     | .     | .    | .    | .    | .     | .     | .     | .     | .     | .     | .     | S    | .    | .   | .    | .    | .    | .    |







eTable 14. Haplotype Frequencies Among Theta Viruses

Theta. Haplotype frequencies of core haplotypes associated with variant-specific polymutants, for those haplotypes with 0.1% haplotype frequency.

| ID | Freq | %      | #  | Y316 | G339 | A419 | D736 | S1807 | T204 | D217 | L438 | D112 | L71 | P323 | L280 | A368 | K155 | P9 | E484 | N501 | T573 | V1176 | A23 | K2 | K68 | R203 | G204 | T391 |
|----|------|--------|----|------|------|------|------|-------|------|------|------|------|-----|------|------|------|------|----|------|------|------|-------|-----|----|-----|------|------|------|
| 1  | 123  | 37.27% | 15 | Y    | G    | A    | G    | F     | T    | N    | P    | E    | F   | L    | F    | V    | K    | P  | K    | Y    | T    | F     | A   | Q  | K   | K    | R    | T    |
| 2  | 53   | 16.06% | 20 | C    | .    | V    | .    | .     | .    | .    | .    | .    | .   | .    | .    | R    | L    | .  | .    | .    | .    | .     | .   | .  | .   | .    | .    | I    |
| 3  | 19   | 5.76%  | 14 | .    | .    | .    | .    | .     | .    | .    | .    | .    | .   | .    | L    | .    | .    | .  | .    | .    | .    | .     | .   | .  | .   | .    | .    | .    |
| 4  | 14   | 4.24%  | 19 | C    | .    | V    | .    | .     | .    | .    | .    | .    | .   | .    | L    | .    | R    | L  | .    | .    | .    | .     | .   | .  | .   | .    | .    | I    |
| 5  | 11   | 3.33%  | 18 | .    | S    | .    | .    | .     | .    | .    | L    | .    | .   | .    | .    | .    | .    | .  | .    | .    | I    | .     | S   | .  | E   | .    | .    | .    |
| 6  | 9    | 2.73%  | 13 | .    | .    | .    | .    | .     | .    | .    | .    | .    | .   | .    | .    | .    | .    | .  | E    | N    | .    | .     | .   | .  | .   | .    | .    | .    |
| 7  | 7    | 2.12%  | 16 | .    | .    | .    | .    | .     | .    | .    | .    | .    | .   | .    | .    | .    | .    | L  | .    | .    | .    | .     | .   | .  | .   | .    | .    | .    |
| 8  | 6    | 1.82%  | 19 | .    | S    | .    | .    | .     | .    | .    | .    | .    | .   | .    | .    | .    | .    | .  | .    | .    | I    | .     | S   | .  | E   | .    | .    | .    |
| 9  | 5    | 1.52%  | 16 | .    | .    | .    | .    | .     | I    | .    | .    | .    | .   | .    | .    | .    | .    | .  | .    | .    | .    | .     | .   | .  | .   | .    | .    | .    |
| 10 | 5    | 1.52%  | 13 | .    | .    | .    | S    | .     | D    | .    | .    | .    | .   | .    | .    | .    | .    | .  | .    | .    | .    | .     | .   | .  | .   | .    | .    | .    |
| 11 | 3    | 0.91%  | 11 | .    | .    | .    | .    | .     | .    | .    | .    | .    | .   | .    | .    | .    | .    | .  | E    | N    | .    | .     | .   | .  | .   | R    | G    | .    |
| 12 | 2    | 0.61%  | 13 | .    | .    | .    | .    | .     | .    | .    | L    | .    | .   | .    | .    | .    | .    | .  | .    | .    | .    | V     | .   | .  | .   | .    | .    | .    |
| 13 | 2    | 0.61%  | 14 | .    | .    | .    | .    | .     | .    | .    | .    | .    | .   | .    | .    | .    | .    | .  | E    | .    | .    | .     | .   | .  | .   | .    | .    | .    |
| 14 | 2    | 0.61%  | 13 | .    | .    | .    | .    | .     | .    | .    | .    | .    | .   | .    | .    | .    | .    | .  | .    | .    | .    | .     | .   | .  | .   | R    | G    | .    |
| 15 | 2    | 0.61%  | 16 | .    | .    | .    | .    | .     | .    | .    | .    | .    | .   | .    | .    | .    | .    | S  | .    | .    | .    | .     | .   | .  | .   | .    | .    | .    |
| 16 | 2    | 0.61%  | 15 | .    | .    | .    | .    | .     | .    | .    | .    | .    | .   | .    | L    | .    | L    | .  | .    | .    | .    | .     | .   | .  | .   | .    | .    | .    |
| 17 | 2    | 0.61%  | 10 | .    | .    | .    | .    | .     | .    | .    | .    | .    | .   | .    | L    | .    | .    | E  | N    | .    | .    | .     | .   | .  | .   | R    | G    | .    |
| 18 | 2    | 0.61%  | 16 | .    | S    | .    | .    | .     | .    | .    | .    | .    | .   | .    | .    | .    | .    | .  | .    | .    | .    | .     | .   | .  | .   | .    | .    | .    |
| 19 | 2    | 0.61%  | 16 | .    | S    | .    | .    | .     | .    | .    | .    | .    | .   | .    | L    | .    | .    | E  | N    | I    | .    | S     | .   | E  | .   | .    | .    | .    |
| 20 | 1    | 0.30%  | 10 | C    | .    | D    | .    | .     | .    | L    | .    | .    | .   | L    | R    | .    | E    | N  | .    | .    | .    | .     | .   | .  | .   | R    | G    | .    |
| 21 | 1    | 0.30%  | 16 | C    | .    | V    | D    | .     | .    | .    | D    | .    | P   | L    | R    | L    | .    | .  | .    | .    | .    | .     | .   | .  | .   | .    | .    | I    |
| 22 | 1    | 0.30%  | 12 | C    | .    | V    | .    | .     | D    | L    | D    | .    | P   | L    | A    | R    | L    | E  | N    | .    | .    | .     | .   | .  | .   | .    | .    | I    |
| 23 | 1    | 0.30%  | 16 | C    | .    | V    | .    | .     | D    | .    | .    | .    | P   | L    | A    | R    | L    | .  | .    | .    | .    | .     | .   | .  | .   | .    | .    | I    |
| 24 | 1    | 0.30%  | 13 | C    | .    | V    | .    | .     | .    | L    | .    | .    | .   | .    | A    | R    | .    | E  | N    | .    | V    | .     | .   | .  | .   | .    | .    | .    |
| 25 | 1    | 0.30%  | 19 | C    | .    | V    | .    | .     | .    | L    | .    | .    | .   | .    | R    | L    | .    | .  | .    | .    | .    | .     | .   | .  | .   | .    | .    | I    |
| 26 | 1    | 0.30%  | 18 | C    | .    | V    | .    | .     | .    | .    | .    | .    | .   | .    | R    | L    | E    | N  | .    | .    | .    | .     | .   | .  | .   | .    | .    | I    |
| 27 | 1    | 0.30%  | 19 | C    | .    | V    | .    | .     | .    | .    | .    | .    | .   | .    | R    | L    | E    | .  | .    | .    | .    | .     | .   | .  | .   | .    | .    | I    |
| 28 | 1    | 0.30%  | 19 | C    | .    | V    | .    | .     | .    | .    | .    | .    | .   | .    | R    | L    | .    | N  | .    | .    | .    | .     | .   | .  | .   | .    | .    | I    |
| 29 | 1    | 0.30%  | 18 | C    | .    | V    | .    | .     | .    | .    | .    | .    | .   | .    | R    | L    | .    | .  | .    | .    | .    | .     | .   | .  | .   | R    | G    | I    |
| 30 | 1    | 0.30%  | 18 | C    | .    | V    | .    | .     | .    | .    | .    | .    | .   | L    | A    | R    | L    | .  | .    | .    | .    | .     | .   | .  | .   | .    | .    | I    |
| 31 | 1    | 0.30%  | 17 | C    | .    | V    | .    | .     | .    | .    | .    | .    | .   | L    | R    | L    | E    | N  | .    | .    | .    | .     | .   | .  | .   | .    | .    | I    |
| 32 | 1    | 0.30%  | 18 | C    | .    | V    | .    | .     | .    | .    | .    | L    | .   | .    | R    | .    | .    | .  | .    | .    | .    | .     | .   | .  | .   | .    | .    | I    |
| 33 | 1    | 0.30%  | 17 | C    | .    | V    | .    | .     | .    | .    | .    | L    | .   | L    | A    | R    | L    | .  | .    | .    | .    | .     | .   | .  | .   | .    | .    | I    |
| 34 | 1    | 0.30%  | 11 | .    | .    | .    | D    | .     | .    | L    | .    | .    | .   | .    | .    | .    | .    | E  | N    | .    | .    | .     | .   | .  | .   | .    | .    | .    |
| 35 | 1    | 0.30%  | 9  | .    | .    | .    | D    | .     | .    | L    | .    | .    | .   | .    | .    | .    | .    | E  | N    | .    | .    | .     | .   | .  | .   | R    | G    | .    |
| 36 | 1    | 0.30%  | 8  | .    | .    | .    | D    | .     | .    | L    | .    | .    | .   | L    | .    | .    | .    | E  | N    | .    | .    | .     | .   | .  | .   | R    | G    | .    |
| 37 | 1    | 0.30%  | 9  | .    | .    | .    | D    | .     | .    | .    | D    | .    | P   | L    | .    | .    | .    | E  | N    | .    | .    | .     | .   | .  | .   | .    | .    | .    |
| 38 | 1    | 0.30%  | 12 | .    | .    | .    | D    | .     | .    | .    | .    | .    | .   | .    | .    | .    | .    | E  | N    | .    | .    | .     | .   | .  | .   | .    | .    | .    |
| 39 | 1    | 0.30%  | 11 | .    | .    | .    | D    | .     | .    | .    | .    | .    | .   | .    | .    | .    | .    | E  | N    | .    | .    | .     | .   | .  | .   | R    | .    | .    |

eTable 15. Haplotype Frequencies Among Zeta Viruses

Zeta. Haplotype frequencies of core haplotypes associated with variant-specific polymutants, for those haplotypes with 0.1% haplotype frequency.

| ID | Freq | %      | #  | NSP5 | NSP7 | NSP12 | Spike | Spike | Spike | N    | N    | N    | N    |
|----|------|--------|----|------|------|-------|-------|-------|-------|------|------|------|------|
|    |      |        |    | L205 | L71  | P323  | E484  | D614  | V1176 | A119 | R203 | G204 | M234 |
| 1  | 2550 | 0.8736 | 10 | V    | F    | L     | K     | G     | F     | S    | K    | R    | I    |
| 2  | 85   | 0.0291 | 9  | L    | .    | .     | .     | .     | .     | .    | .    | .    | .    |
| 3  | 80   | 0.0274 | 9  | .    | .    | .     | E     | .     | .     | .    | .    | .    | .    |
| 4  | 21   | 0.0072 | 9  | .    | .    | .     | .     | V     | .     | .    | .    | .    | .    |
| 5  | 18   | 0.0062 | 9  | .    | .    | .     | .     | .     | A     | .    | .    | .    | .    |
| 6  | 17   | 0.0058 | 8  | .    | .    | P     | E     | .     | .     | .    | .    | .    | .    |
| 7  | 17   | 0.0058 | 9  | .    | .    | P     | .     | .     | .     | .    | .    | .    | .    |
| 8  | 14   | 0.0048 | 8  | .    | .    | P     | .     | V     | .     | .    | .    | .    | .    |
| 9  | 12   | 0.0041 | 7  | .    | .    | .     | .     | .     | .     | R    | G    | M    | .    |
| 10 | 10   | 0.0034 | 8  | .    | .    | .     | .     | .     | .     | R    | G    | .    | .    |
| 11 | 10   | 0.0034 | 9  | .    | .    | .     | .     | .     | .     | R    | .    | .    | .    |
| 12 | 9    | 0.0031 | 9  | .    | .    | .     | .     | .     | .     | .    | .    | M    | .    |
| 13 | 8    | 0.0027 | 8  | .    | .    | .     | E     | .     | .     | .    | .    | M    | .    |
| 14 | 8    | 0.0027 | 10 | .    | .    | .     | .     | .     | .     | .    | L    | .    | .    |
| 15 | 4    | 0.0014 | 8  | .    | .    | .     | .     | .     | A     | .    | .    | M    | .    |
| 16 | 4    | 0.0014 | 8  | .    | .    | .     | .     | V     | .     | .    | .    | M    | .    |
| 17 | 3    | 0.001  | 6  | L    | .    | .     | E     | D     | V     | .    | .    | .    | .    |
| 18 | 3    | 0.001  | 8  | .    | .    | .     | .     | .     | A     | R    | .    | .    | .    |

eTable 16. Concordance Analysis in the Training Set

Result from the concordance analysis of GISAID assigned variant (columns) with haplotype-based variant assignment (rows) in the training data set with 4,393,998 viruses (50% of all viruses at GISAID, downloaded on March 14, 2022).

| Predction <sup>1</sup> | Alpha   | Beta   | Delta     | Epsilon | Eta   | Gamma  | GH/490R | Iota   | Kappa | Lambda | Mu    | Omicron   | Theta | Zeta  | UA <sup>4</sup> | Sub-total |
|------------------------|---------|--------|-----------|---------|-------|--------|---------|--------|-------|--------|-------|-----------|-------|-------|-----------------|-----------|
| Alpha                  | 573,599 |        | 4         |         |       | 3      |         |        |       |        |       |           |       |       | 2,497           | 576,103   |
| Beta                   |         | 8,021  |           |         |       |        |         |        |       |        |       |           |       |       | 90              | 8,111     |
| Delta                  | 1       | 1      | 2,120,806 |         |       |        |         |        | 6     |        |       | 2         |       |       | 1,486           | 2,122,302 |
| Epsilon                | 1       |        | 9         | 35,883  |       |        |         | 1      |       |        | 3     | 1         |       |       | 145,822         | 181,720   |
| Eta                    | 1       |        | 2         |         | 4,695 |        |         |        |       |        |       |           |       |       | 33              | 4,731     |
| Gamma                  |         |        | 1         |         |       | 59,471 |         |        |       |        |       |           |       |       | 95              | 59,567    |
| GH/490R                |         |        |           |         |       |        | 422     |        |       |        |       |           |       |       |                 | 422       |
| Iota                   | 1       | 1      |           |         |       |        |         | 18,589 |       |        |       |           |       |       | 68              | 18,659    |
| Kappa                  | 1       |        | 2         |         |       |        |         |        | 3,796 |        |       |           |       |       | 48              | 3,847     |
| Lambda                 |         |        |           |         |       | 1      |         |        |       | 5,077  |       |           |       |       | 6               | 5,084     |
| Mu                     |         |        |           | 1       |       |        |         |        |       |        | 5,634 |           |       |       | 38              | 5,673     |
| Omicron                |         |        | 2         |         |       |        |         |        |       |        |       | 1,487,867 |       |       | 704             | 1,488,573 |
| Theta                  |         |        |           |         |       |        |         |        |       |        |       |           | 148   |       | 1               | 149       |
| Zeta                   |         |        |           |         |       | 4      |         |        |       | 1      |       |           | 1     | 2,918 | 24,546          | 27,470    |
| MV <sup>2</sup>        | 385     | 12,940 | 19,917    | 11      | 16    | 658    | 8       | 3,140  | 43    | 9      | 2,193 | 112,137   | 181   | 1     | 7,633           | 159,272   |
| UP <sup>3</sup>        | 446     | 97     | 1,702     | 53      | 3     | 63     | 1       | 12     | 66    | 13     | 2     | 1,333     |       | 1     | 360,335         | 364,127   |
| Sub-total              | 574,435 | 21,060 | 2,142,445 | 35,948  | 4,714 | 60,200 | 431     | 21,742 | 3,911 | 5,100  | 7,832 | 1,601,340 | 330   | 2,920 | 543,402         | 5,025,810 |

<sup>1</sup>Posterior probability threshold=0.99; <sup>2</sup>MV for mixture of variants; <sup>3</sup>UP for unpredictable variant; <sup>4</sup>UC for unclassified variant

eTable 17. Concordance Analysis in the Validation Set

Result from the concordance analysis of GISAID assigned variant (columns) with haplotype-based variant assignment (rows) in the training data set with 4,393,998 viruses (50% of all viruses at GISAID, downloaded on March 14, 2022).

| Prediction <sup>1</sup> | Alpha            | Beta          | Delta            | Epsilon       | Eta          | Gamma          | GH/490R    | Iota          | Kappa        | Lambda        | Mu            | Omicron          | Theta      | Zeta         | UA <sup>4</sup>  | Sub-total         |
|-------------------------|------------------|---------------|------------------|---------------|--------------|----------------|------------|---------------|--------------|---------------|---------------|------------------|------------|--------------|------------------|-------------------|
| Alpha                   | 1,148,060        | 1             | 4                |               |              | 6              |            |               | 1            |               |               |                  |            |              | 5,218            | 1,153,290         |
| Beta                    |                  | 15,492        |                  |               |              |                |            |               |              |               |               |                  |            |              | 145              | 15,637            |
| Delta                   | 4                |               | 4,246,693        |               |              | 1              |            |               | 11           |               |               | 5                |            |              | 3,184            | 4,249,898         |
| Epsilon                 | 2                | 8             | 24               | 71,899        |              | 1              |            | 3             |              |               | 7             | 3                |            |              | 298,020          | 369,967           |
| Eta                     | 1                | 1             | 5                |               | 9,398        |                |            |               |              |               |               |                  |            |              | 92               | 9,497             |
| Gamma                   |                  |               | 1                |               |              | 118,898        |            |               |              |               |               |                  |            |              | 193              | 119,092           |
| GH/490R                 |                  |               |                  |               |              |                | 8          |               |              |               |               |                  |            |              |                  | 8                 |
| Iota                    |                  | 2             |                  |               |              |                |            | 37,951        |              |               |               |                  |            |              | 143              | 38,096            |
| Kappa                   |                  |               | 40               |               |              |                |            |               | 7,558        |               |               |                  |            |              | 113              | 7,711             |
| Lambda                  |                  |               |                  |               |              | 2              |            |               |              | 10,058        |               |                  |            |              | 16               | 10,076            |
| Mu                      |                  |               |                  | 1             |              |                |            |               |              |               | 7,348         |                  |            |              | 60               | 7,409             |
| Omicron                 |                  |               | 2                |               |              |                |            |               |              | 1             |               | 3,003,288        |            |              | 1,600            | 3,004,891         |
| Theta                   |                  |               |                  |               |              |                |            |               |              |               |               |                  | 414        |              | 1                | 415               |
| Zeta                    | 3                | 5             | 3                |               |              | 12             |            | 4             |              |               |               | 2                |            | 5,886        | 53,014           | 58,929            |
| MV <sup>2</sup>         | 732              | 26,350        | 35,585           | 56            | 54           | 1,399          | 879        | 5,315         | 90           | 12            | 8,518         | 194,988          | 211        | 1            | 18,028           | 292,218           |
| UP <sup>3</sup>         | 825              | 122           | 3,248            | 84            | 3            | 86             |            | 14            | 98           | 24            | 5             | 3,232            |            | 1            | 706,744          | 714,486           |
| <b>Sub-total</b>        | <b>1,149,627</b> | <b>41,981</b> | <b>4,285,605</b> | <b>72,040</b> | <b>9,455</b> | <b>120,405</b> | <b>887</b> | <b>43,287</b> | <b>7,758</b> | <b>10,095</b> | <b>15,878</b> | <b>3,201,518</b> | <b>625</b> | <b>5,888</b> | <b>1,086,571</b> | <b>10,051,620</b> |

<sup>1</sup>Posterior probability threshold=0.99; <sup>2</sup>MV for mixture of variants; <sup>3</sup>UP for unpredictable variant; <sup>4</sup>UA for unassigned variant

eTable 18. Concordance Analysis in the Prospective Set

Result from the concordance analysis of GISAID assigned variant (columns) with haplotype-based variant assignment (rows) in the prospective data set with 343,431 viruses, collected after March 14, 2022 and downloaded on May 18, 2022.

| <b>Predction<sup>1</sup></b> | Alpha | Delta | Epsilon | Eta | Lambda | Omicron | Zeta | <b>UA<sup>4</sup></b> | Sub-total |
|------------------------------|-------|-------|---------|-----|--------|---------|------|-----------------------|-----------|
| Alpha                        | 2     |       |         |     |        | 4       |      |                       | 6         |
| Delta                        |       | 171   |         |     |        | 3       |      |                       | 174       |
| Epsilon                      |       |       | 0       |     |        | 2       |      | 3                     | 5         |
| Eta                          |       |       |         | 0   |        |         |      | 1                     | 1         |
| Lambda                       |       |       |         |     | 1      |         |      |                       | 1         |
| Omicron                      |       |       |         |     |        | 319,812 |      | 567                   | 320,379   |
| Zeta                         |       |       |         |     |        |         | 0    | 1                     | 1         |
| <b>MV<sup>2</sup></b>        |       | 5     |         |     |        | 22,072  |      | 30                    | 22,107    |
| <b>UP<sup>3</sup></b>        |       | 4     |         |     |        | 1,699   |      | 524                   | 2,227     |
| <b>Sub-total</b>             | 2     | 180   |         |     | 1      | 343,592 |      | 1,126                 | 344,901   |









eTable 22. Four Mixture Variants with Omicron-Epsilon  
Geo- and temporal distribution of Epsilon-Omicron recombinants in the world.

| Collection Date | Africa/Mauritius | Africa/South Africa | Asia/Israel | Asia/Japan | Asia/Malaysia | Asia/Singapore | Asia/South Korea | Asia/Thailand | Europe/Austria | Europe/Belgium | Europe/Croatia | Europe/Czech Republic | Europe/Denmark | Europe/Estonia | Europe/Finland | Europe/France | Europe/Germany | Europe/Ireland | Europe/Italy | Europe/Lithuania | Europe/Luxembourg | Europe/Netherlands | Europe/Norway | Europe/Poland | Europe/Portugal | Europe/Slovakia | Europe/Slovenia | Europe/Spain | Europe/Sweden | Europe/Switzerland | Europe/Turkey | Europe/United Kingdom | North America/Canada | North America/Costa Rica | North America/USA | Oceania/Australia | Oceania/New Zealand | South America/Brazil | South America/Chile | South America/Colombia | total |    |    |
|-----------------|------------------|---------------------|-------------|------------|---------------|----------------|------------------|---------------|----------------|----------------|----------------|-----------------------|----------------|----------------|----------------|---------------|----------------|----------------|--------------|------------------|-------------------|--------------------|---------------|---------------|-----------------|-----------------|-----------------|--------------|---------------|--------------------|---------------|-----------------------|----------------------|--------------------------|-------------------|-------------------|---------------------|----------------------|---------------------|------------------------|-------|----|----|
| 2022-03-15      |                  |                     |             |            |               |                | 1                |               |                |                |                |                       |                |                |                |               |                |                |              |                  |                   |                    |               | 1             |                 |                 | 1               | 1            | 1             |                    |               |                       |                      |                          |                   |                   |                     |                      |                     |                        | 6     |    |    |
| 2022-03-16      |                  | 1                   |             |            |               |                |                  |               |                |                |                |                       |                |                |                | 1             |                |                |              |                  |                   |                    |               |               |                 |                 |                 | 1            |               |                    |               |                       |                      |                          |                   |                   |                     |                      |                     |                        |       |    | 8  |
| 2022-03-17      |                  | 1                   |             |            |               |                |                  |               |                |                |                |                       |                |                |                | 1             |                |                |              |                  |                   | 1                  | 1             |               |                 |                 |                 |              | 2             |                    |               |                       |                      |                          |                   |                   |                     |                      |                     |                        | 8     |    |    |
| 2022-03-18      |                  |                     |             |            |               |                |                  |               |                |                |                |                       |                |                |                |               | 1              | 1              |              |                  |                   |                    |               |               |                 |                 |                 | 1            | 1             |                    |               |                       |                      |                          |                   |                   |                     |                      |                     |                        |       | 10 |    |
| 2022-03-19      |                  |                     |             |            |               |                |                  |               |                |                |                | 2                     |                |                |                |               | 1              |                |              |                  |                   |                    |               |               |                 |                 |                 |              |               |                    |               |                       |                      |                          |                   |                   |                     |                      |                     |                        |       | 6  |    |
| 2022-03-20      |                  |                     |             |            |               |                |                  |               |                |                |                |                       |                |                |                |               |                |                |              |                  |                   |                    |               |               |                 |                 |                 |              |               |                    |               |                       |                      |                          |                   |                   |                     |                      |                     |                        |       | 1  |    |
| 2022-03-21      |                  |                     |             |            |               |                |                  |               |                |                |                |                       |                |                |                |               | 2              |                |              |                  |                   |                    |               |               |                 |                 |                 | 1            |               |                    |               |                       |                      |                          |                   |                   |                     |                      |                     |                        |       | 8  |    |
| 2022-03-22      |                  |                     |             |            |               |                |                  | 1             | 1              |                |                |                       | 1              | 1              |                | 1             | 1              | 4              |              |                  |                   |                    |               |               |                 |                 |                 |              | 1             |                    |               |                       |                      |                          |                   |                   |                     |                      |                     |                        |       | 15 |    |
| 2022-03-23      |                  |                     |             | 1          |               |                |                  |               |                |                |                |                       |                |                |                |               |                |                |              |                  |                   |                    |               |               | 2               |                 |                 |              |               |                    |               |                       |                      |                          |                   |                   |                     |                      |                     |                        |       | 8  |    |
| 2022-03-24      |                  |                     |             |            |               |                | 1                |               |                |                |                |                       |                |                |                |               |                |                |              |                  |                   | 1                  | 2             |               |                 |                 |                 |              |               |                    |               |                       |                      |                          |                   |                   |                     |                      |                     |                        |       | 13 |    |
| 2022-03-25      |                  |                     |             |            |               |                |                  |               |                |                |                |                       |                |                |                |               |                |                | 1            |                  |                   |                    |               |               |                 |                 |                 |              |               |                    |               |                       |                      |                          |                   |                   |                     |                      |                     |                        |       | 3  |    |
| 2022-03-26      |                  |                     | 3           | 3          |               |                |                  |               |                |                |                |                       |                |                |                |               |                |                |              |                  |                   |                    |               |               |                 |                 |                 |              |               |                    |               |                       |                      |                          |                   |                   |                     |                      |                     |                        |       | 6  |    |
| 2022-03-27      | 1                |                     |             |            |               |                |                  |               |                |                | 1              |                       |                |                |                |               |                |                |              |                  |                   |                    |               |               |                 |                 |                 |              |               |                    |               |                       |                      |                          |                   |                   |                     |                      |                     |                        |       | 3  |    |
| 2022-03-28      |                  |                     |             |            |               |                |                  |               |                |                |                |                       |                | 1              | 1              | 1             | 1              |                |              |                  |                   |                    |               |               |                 |                 |                 | 1            | 1             |                    |               |                       |                      |                          |                   |                   |                     |                      |                     |                        |       | 9  |    |
| 2022-03-29      |                  |                     | 2           |            |               |                |                  |               | 1              |                |                |                       |                |                |                |               | 2              |                |              |                  |                   |                    |               |               |                 |                 |                 | 1            |               |                    |               |                       |                      |                          |                   |                   |                     |                      |                     |                        |       | 10 |    |
| 2022-03-30      |                  |                     |             |            |               |                |                  |               |                |                |                | 1                     |                |                |                | 1             |                |                |              |                  |                   |                    |               |               |                 |                 |                 | 2            |               |                    |               |                       |                      |                          |                   |                   |                     |                      |                     |                        |       | 5  |    |
| 2022-03-31      |                  |                     |             |            |               |                |                  |               |                | 1              | 1              |                       |                |                |                |               | 3              |                |              |                  |                   |                    |               |               |                 |                 |                 | 2            |               |                    |               |                       |                      |                          |                   |                   |                     |                      |                     |                        |       | 8  |    |
| 2022-04-01      |                  |                     |             |            |               |                |                  |               |                |                | 1              |                       |                |                |                |               |                |                |              |                  |                   |                    |               |               |                 |                 |                 |              |               |                    |               |                       |                      |                          |                   |                   |                     |                      |                     |                        |       |    | 6  |
| 2022-04-02      | 1                | 1                   |             |            |               |                |                  |               |                |                |                |                       |                |                |                |               | 1              |                |              |                  |                   |                    |               |               |                 |                 |                 |              |               |                    |               |                       |                      |                          |                   |                   |                     |                      |                     |                        |       | 7  |    |
| 2022-04-03      |                  |                     |             |            |               |                |                  |               |                |                |                |                       |                |                |                |               | 1              |                |              |                  |                   |                    |               |               |                 |                 |                 | 1            |               |                    |               |                       |                      |                          |                   |                   |                     |                      |                     |                        |       |    | 6  |
| 2022-04-04      |                  |                     | 1           |            |               |                |                  |               |                |                |                |                       |                |                |                | 2             | 1              |                |              |                  |                   |                    |               |               |                 |                 |                 |              |               |                    |               |                       |                      |                          |                   |                   |                     |                      |                     |                        |       | 6  |    |
| 2022-04-05      |                  |                     |             |            |               |                |                  |               |                | 1              |                |                       |                |                |                |               |                | 1              |              |                  |                   |                    |               |               |                 |                 |                 | 1            |               |                    |               |                       |                      |                          |                   |                   |                     |                      |                     |                        |       |    | 8  |
| 2022-04-06      | 1                |                     |             |            |               |                |                  |               |                | 3              |                |                       |                |                |                |               |                |                |              |                  |                   |                    |               |               |                 |                 |                 | 1            | 1             |                    |               |                       |                      |                          |                   |                   |                     |                      |                     |                        |       |    | 15 |
| 2022-04-07      |                  | 1                   |             |            |               |                |                  |               |                |                |                |                       |                |                |                |               | 1              |                |              |                  |                   |                    |               |               |                 |                 |                 |              |               |                    |               |                       |                      |                          |                   |                   |                     |                      |                     |                        |       |    | 11 |
| 2022-04-08      |                  | 2                   |             |            |               |                |                  |               |                |                |                |                       |                |                |                |               | 1              |                |              |                  |                   |                    |               |               |                 |                 |                 |              |               |                    |               |                       |                      |                          |                   |                   |                     |                      |                     |                        |       |    | 8  |
| 2022-04-09      |                  |                     |             |            |               |                |                  |               |                |                |                |                       |                |                |                |               |                |                |              |                  |                   |                    |               |               |                 |                 |                 |              |               |                    |               |                       |                      |                          |                   |                   |                     |                      |                     |                        |       |    | 10 |
| 2022-04-10      |                  |                     |             |            |               | 1              |                  |               |                |                |                | 1                     |                |                |                |               |                |                |              |                  |                   |                    |               |               |                 |                 |                 |              |               |                    |               |                       |                      |                          |                   |                   |                     |                      |                     |                        |       |    | 9  |
| 2022-04-11      |                  |                     |             |            |               |                | 2                |               |                |                |                |                       | 1              | 6              |                |               | 5              | 3              |              |                  |                   |                    |               |               |                 |                 |                 |              |               |                    |               |                       |                      |                          |                   |                   |                     |                      |                     |                        |       |    | 31 |
| 2022-04-12      |                  |                     |             |            |               |                |                  |               |                |                |                |                       |                | 2              | 2              |               |                |                |              |                  |                   |                    |               |               |                 |                 |                 |              |               |                    |               |                       |                      |                          |                   |                   |                     |                      |                     |                        |       |    | 17 |
| 2022-04-13      | 1                | 1                   |             |            |               |                |                  |               |                |                |                |                       |                |                |                |               |                |                |              |                  |                   |                    |               |               |                 |                 |                 |              |               |                    |               |                       |                      |                          |                   |                   |                     |                      |                     |                        |       |    | 14 |
| 2022-04-14      |                  |                     |             |            |               |                |                  |               |                |                |                |                       |                |                |                |               |                |                |              |                  |                   |                    |               |               |                 |                 |                 |              |               |                    |               |                       |                      |                          |                   |                   |                     |                      |                     |                        |       |    | 23 |
| 2022-04-15      |                  |                     |             |            |               |                |                  |               |                |                |                |                       |                |                |                |               |                |                |              |                  |                   |                    |               |               |                 |                 |                 |              |               |                    |               |                       |                      |                          |                   |                   |                     |                      |                     |                        |       |    | 10 |
| 2022-04-16      | 1                |                     |             |            |               |                |                  |               |                | 1              | 1              |                       |                |                |                |               |                |                |              |                  |                   |                    |               |               |                 |                 |                 |              |               |                    |               |                       |                      |                          |                   |                   |                     |                      |                     |                        |       |    | 15 |
| 2022-04-17      |                  |                     |             |            |               | 1              |                  |               |                |                |                |                       |                |                |                |               |                |                |              |                  |                   |                    |               |               |                 |                 |                 |              |               |                    |               |                       |                      |                          |                   |                   |                     |                      |                     |                        |       |    | 8  |
| 2022-04-18      | 1                |                     |             |            |               |                |                  |               |                |                |                |                       |                |                |                |               |                |                |              |                  |                   |                    |               |               |                 |                 |                 |              |               |                    |               |                       |                      |                          |                   |                   |                     |                      |                     |                        |       |    | 20 |
| 2022-04-19      | 1                |                     |             |            |               |                |                  |               |                |                |                |                       |                |                |                |               |                |                |              |                  |                   |                    |               |               |                 |                 |                 |              |               |                    |               |                       |                      |                          |                   |                   |                     |                      |                     |                        |       |    | 28 |
| 2022-04-20      |                  |                     |             |            |               | 1              |                  |               |                |                |                |                       |                |                |                |               |                |                |              |                  |                   |                    |               |               |                 |                 |                 |              |               |                    |               |                       |                      |                          |                   |                   |                     |                      |                     |                        |       |    | 10 |
| 2022-04-21      | 1                |                     |             |            |               |                |                  |               |                |                |                |                       |                |                |                |               |                |                |              |                  |                   |                    |               |               |                 |                 |                 |              |               |                    |               |                       |                      |                          |                   |                   |                     |                      |                     |                        |       |    | 18 |
| 2022-04-22      | 2                |                     |             |            |               | 1              |                  |               |                |                |                |                       |                |                |                |               |                |                |              |                  |                   |                    |               |               |                 |                 |                 |              |               |                    |               |                       |                      |                          |                   |                   |                     |                      |                     |                        |       |    | 26 |
| 2022-04-23      |                  |                     |             |            |               |                | 1                |               |                |                |                |                       |                |                |                |               |                |                |              |                  |                   |                    |               |               |                 |                 |                 |              |               |                    |               |                       |                      |                          |                   |                   |                     |                      |                     |                        |       |    | 15 |
| 2022-04-24      |                  |                     |             |            |               |                |                  |               |                |                |                |                       |                |                |                |               |                |                |              |                  |                   |                    |               |               |                 |                 |                 |              |               |                    |               |                       |                      |                          |                   |                   |                     |                      |                     |                        |       |    | 14 |
| 2022-04-25      |                  |                     |             |            |               |                |                  |               |                |                |                |                       |                |                |                |               |                |                |              |                  |                   |                    |               |               |                 |                 |                 |              |               |                    |               |                       |                      |                          |                   |                   |                     |                      |                     |                        |       |    | 23 |
| 2022-04-26      |                  |                     |             |            |               |                |                  |               |                |                |                |                       |                |                |                |               |                |                |              |                  |                   |                    |               |               |                 |                 |                 |              |               |                    |               |                       |                      |                          |                   |                   |                     |                      |                     |                        |       |    | 32 |
| 2022-04-27      |                  |                     |             |            |               | 1              |                  |               |                |                |                |                       |                |                |                |               |                |                |              |                  |                   |                    |               |               |                 |                 |                 |              |               |                    |               |                       |                      |                          |                   |                   |                     |                      |                     |                        |       |    | 16 |
| 2022-04-28      |                  |                     |             |            |               |                |                  |               |                |                |                |                       |                |                |                |               |                |                |              |                  |                   |                    |               |               |                 |                 |                 |              |               |                    |               |                       |                      |                          |                   |                   |                     |                      |                     |                        |       |    | 19 |
| 2022-04-29      |                  |                     |             |            |               |                |                  |               |                |                |                |                       |                |                |                |               |                |                |              |                  |                   |                    |               |               |                 |                 |                 |              |               |                    |               |                       |                      |                          |                   |                   |                     |                      |                     |                        |       |    | 15 |
| 2022-04-30      |                  |                     |             |            |               |                |                  |               |                |                |                |                       |                |                |                |               |                |                |              |                  |                   |                    |               |               |                 |                 |                 |              |               |                    |               |                       |                      |                          |                   |                   |                     |                      |                     |                        |       |    | 5  |
| 2022-05-01      |                  |                     |             |            |               |                |                  |               |                |                |                |                       |                |                |                |               |                |                |              |                  |                   |                    |               |               |                 |                 |                 |              |               |                    |               |                       |                      |                          |                   |                   |                     |                      |                     |                        |       |    | 6  |
| 2022-05-02      |                  |                     |             |            |               |                |                  |               |                |                |                |                       |                |                |                |               |                |                |              |                  |                   |                    |               |               |                 |                 |                 |              |               |                    |               |                       |                      |                          |                   |                   |                     |                      |                     |                        |       |    | 8  |
| 2022-05-03      |                  |                     |             |            |               |                |                  |               |                |                |                |                       |                |                |                |               |                |                |              |                  |                   |                    |               |               |                 |                 |                 |              |               |                    |               |                       |                      |                          |                   |                   |                     |                      |                     |                        |       |    | 11 |
| 2022-05-04      |                  |                     |             |            |               |                |                  |               |                |                |                |                       |                |                |                |               |                |                |              |                  |                   |                    |               |               |                 |                 |                 |              |               |                    |               |                       |                      |                          |                   |                   |                     |                      |                     |                        |       |    | 6  |
| 2022-05-05      |                  |                     |             |            |               |                |                  |               |                |                |                |                       |                |                |                |               |                |                |              |                  |                   |                    |               |               |                 |                 |                 |              |               |                    |               |                       |                      |                          |                   |                   |                     |                      |                     |                        |       |    | 1  |
| 2022-05-06      |                  |                     |             |            |               |                |                  |               |                |                |                |                       |                |                |                |               |                |                |              |                  |                   |                    |               |               |                 |                 |                 |              |               |                    |               |                       |                      |                          |                   |                   |                     |                      |                     |                        |       |    | 3  |
| 2022-05-08      |                  |                     |             |            |               |                |                  |               |                |                |                |                       |                |                |                |               |                |                |              |                  |                   |                    |               |               |                 |                 |                 |              |               |                    |               |                       |                      |                          |                   |                   |                     |                      |                     |                        |       |    | 1  |
| 2022-05-09      |                  |                     |             |            |               |                |                  |               |                |                |                |                       |                |                |                |               |                |                |              |                  |                   |                    |               |               |                 |                 |                 |              |               |                    |               |                       |                      |                          |                   |                   |                     |                      |                     |                        |       |    | 1  |
| total           | 1                | 3                   | 13          | 6          | 4             | 1              | 4                | 5             | 1              | 13             | 6              | 12                    | 33             | 1              | 2              | 19            | 71             | 7              | 7            | 1                | 4                 | 14                 | 6             | 4             | 4               | 2               | 2               | 18           | 13            | 1                  | 1             | 158                   | 31                   | 1                        | 124               | 8                 | 3                   | 1                    | 3                   | 1                      | 609   |    |    |

eTable 23. Mixture Variant and Corresponding Lineages  
 Relationship of mixture variants with their assigned lineages

| Lineage   | Omicron-Delta | Omicron-Epsilon | Omicron-Alpha | Omicron-Zeta | Alpha-Epsilon | Delta-Kappa | Delta-Zeta | total |
|-----------|---------------|-----------------|---------------|--------------|---------------|-------------|------------|-------|
| AY.25     |               |                 |               |              |               | 1           |            | 1     |
| AY.38     |               |                 |               |              |               |             | 1          | 1     |
| AY.4.14   |               |                 |               |              |               | 1           |            | 1     |
| AY.4.15   |               |                 |               |              |               | 1           |            | 1     |
| AY.45     |               |                 |               |              |               |             | 1          | 1     |
| BA.1      | 1             | 1               | 3             | 1            |               |             |            | 6     |
| BA.1.1    |               | 30              | 2             | 2            |               |             |            | 34    |
| BA.1.1.1  |               | 6               |               |              |               |             |            | 6     |
| BA.1.1.14 |               | 1               |               |              |               |             |            | 1     |
| BA.1.1.15 |               | 1               |               |              |               |             |            | 1     |
| BA.1.1.2  |               | 5               |               |              |               |             |            | 5     |
| BA.1.14   |               | 3               |               |              |               |             |            | 3     |
| BA.1.15   |               | 1               |               |              |               |             |            | 1     |
| BA.1.17   |               | 1               |               |              |               |             |            | 1     |
| BA.1.17.2 |               | 1               |               |              |               |             |            | 1     |
| BA.1.18   |               | 2               |               |              |               |             |            | 2     |
| BA.1.19   |               | 1               |               |              |               |             |            | 1     |
| BA.2      | 2             | 354             | 15            | 5            | 6             |             |            | 382   |
| BA.2.1    |               | 5               |               |              |               |             |            | 5     |
| BA.2.10   |               | 5               |               | 1            | 1             |             |            | 7     |
| BA.2.12   |               | 4               |               |              |               |             |            | 4     |
| BA.2.15   |               | 2               |               |              |               |             |            | 2     |
| BA.2.2    |               | 1               |               |              |               |             |            | 1     |
| BA.2.20   |               | 3               |               |              |               |             |            | 3     |
| BA.2.21   |               | 1               |               |              |               |             |            | 1     |
| BA.2.22   |               | 3               |               |              |               |             |            | 3     |
| BA.2.23   |               | 4               |               |              |               |             |            | 4     |
| BA.2.24   |               | 1               |               |              |               |             |            | 1     |
| BA.2.26   |               | 1               |               |              |               |             |            | 1     |
| BA.2.3    |               | 88              |               |              | 3             |             |            | 91    |
| BA.2.3.4  |               | 9               |               |              |               |             |            | 9     |
| BA.2.4    |               | 1               |               |              |               |             |            | 1     |
| BA.2.7    |               | 1               |               |              |               |             |            | 1     |
| BA.2.8    |               | 1               |               |              |               |             |            | 1     |
| BA.2.9    |               | 71              | 5             |              |               |             |            | 76    |
| BA.4      |               | 1               |               |              |               |             |            | 1     |
| BA.5      |               |                 |               | 1            |               |             |            | 1     |
| total     | 3             | 609             | 25            | 10           | 10            | 3           | 2          | 662   |

eTable 24. Unidentifiable Omicron Viruses and Corresponding Lineages

HAI-unpredictable Omicron viruses and their assigned lineages

|              | <b>O1</b>  | <b>O2</b>  | <b>O3</b>  | <b>O4</b>  | total       |
|--------------|------------|------------|------------|------------|-------------|
| BA.1         | 22         | 5          | 55         | 3          | 85          |
| BA.1.1       | 3          |            | 54         | 1          | 58          |
| BA.1.1.1     |            |            | 4          |            | 4           |
| BA.1.1.13    |            |            | 1          |            | 1           |
| BA.1.1.18    |            |            | 1          |            | 1           |
| BA.1.15      |            |            | 2          |            | 2           |
| BA.1.15.2    |            |            | 1          |            | 1           |
| BA.1.17      |            |            | 5          |            | 5           |
| BA.1.20      |            |            | 1          |            | 1           |
| BA.1.9       |            |            | 1          |            | 1           |
| BA.2         | 510        | 253        |            | 323        | 1086        |
| BA.2.10      | 9          | 5          |            |            | 14          |
| BA.2.12      | 23         | 13         |            |            | 36          |
| BA.2.12.1    | 18         | 6          |            |            | 24          |
| BA.2.18      | 2          |            |            |            | 2           |
| BA.2.19      |            | 1          |            |            | 1           |
| BA.2.23      | 35         | 9          |            | 3          | 47          |
| BA.2.3       | 18         | 19         |            | 1          | 38          |
| BA.2.3.2     |            | 3          |            |            | 3           |
| BA.2.3.3     | 1          |            |            |            | 1           |
| BA.2.31      | 4          | 2          |            |            | 6           |
| BA.2.32      | 1          |            |            |            | 1           |
| BA.2.5       | 1          | 1          |            |            | 2           |
| BA.2.6       | 2          |            |            |            | 2           |
| BA.2.7       | 2          |            |            |            | 2           |
| BA.2.8       |            | 2          |            |            | 2           |
| BA.2.9       | 27         | 16         |            | 9          | 52          |
| BA.3         | 1          | 1          |            |            | 2           |
| BA.3.1       | 4          |            |            |            | 4           |
| BA.4         | 1          |            |            |            | 1           |
| BA.5         | 3          |            |            |            | 3           |
| Unassigned   | 131        | 62         | 9          |            | 202         |
| XE           | 8          | 1          |            |            | 9           |
| <b>total</b> | <b>826</b> | <b>399</b> | <b>134</b> | <b>340</b> | <b>1699</b> |

eTable 25. New Mutations Among Variant-Unassigned and Unidentifiable Viruses

Ab initio mutations (excluding all core polymutants of 14 known variants) have been found to significant temporal trend

|    | <b>Polymutant</b> | <b>cluster</b> | <b>p-value</b> | <b>LAMP</b> | <b>LAMP-max</b> |
|----|-------------------|----------------|----------------|-------------|-----------------|
| 1  | NSP1_F143         | O1             | 3.43E-02       | 2.25E-02    | 7.62E-02        |
| 2  | NSP1_K141         | O1             | 3.43E-02       | 2.25E-02    | 7.62E-02        |
| 3  | NSP1_S142         | O1             | 3.43E-02       | 2.25E-02    | 7.62E-02        |
| 4  | Spike_A684        | O1             | 1.94E-02       | 2.00E-02    | 9.05E-02        |
| 5  | Spike_I68         | O1             | 4.10E-02       | 2.09E-02    | 1.22E-01        |
| 6  | NSP2_F356         | O2             | 1.04E-02       | 2.34E-02    | 1.09E-01        |
| 7  | NSP6_L105         | O2             | 2.76E-04       | 8.18E-02    | 2.09E-01        |
| 8  | NS3_H78           | O3             | 3.56E-02       | 9.53E-02    | 1.67E-01        |
| 9  | Spike_L24         | O4             | 3.12E-05       | 3.30E-01    | 5.33E-01        |
| 10 | Spike_P25         | O4             | 1.66E-05       | 3.32E-01    | 5.41E-01        |
| 11 | NSP6_F108         | O5             | 2.09E-06       | 4.42E-01    | 6.02E-01        |
| 12 | NSP6_G107         | O5             | 4.32E-05       | 5.20E-01    | 6.70E-01        |
| 13 | NSP6_S106         | O5             | 6.73E-05       | 5.14E-01    | 6.61E-01        |
| 14 | N_E31             | O6             | 1.99E-02       | 6.52E-01    | 7.15E-01        |
| 15 | N_R32             | O6             | 1.70E-02       | 6.39E-01    | 7.00E-01        |
| 16 | N_S33             | O6             | 1.03E-02       | 6.49E-01    | 7.18E-01        |

eFigure 1. Heatmap-representation of selected polymutant temporal profile from January 1, 2020 to March 14, 2022 within every variant: A) Alpha, B) Beta, C) Delta, D) Epsilon, E) Eta, F) Gamma, G) GH/490R, H) Iota, I) Kappa, J) Lambda, K) Mu L) Omicron, M) Theta, N) Zeta and O) variant-unassigned viruses. In each profile, estimated locally-averaged mutation percentages (LAMP) take value from 0 to 1, and are color-coded (the legend), and each row corresponds to a polymutant while each column corresponds to collection date.

A)

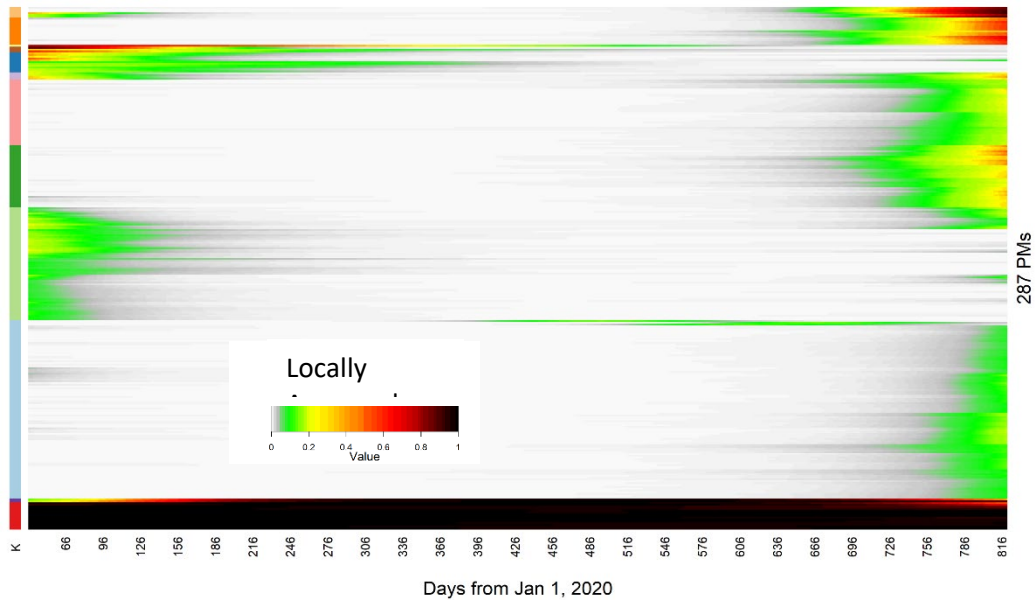

## B) Beta

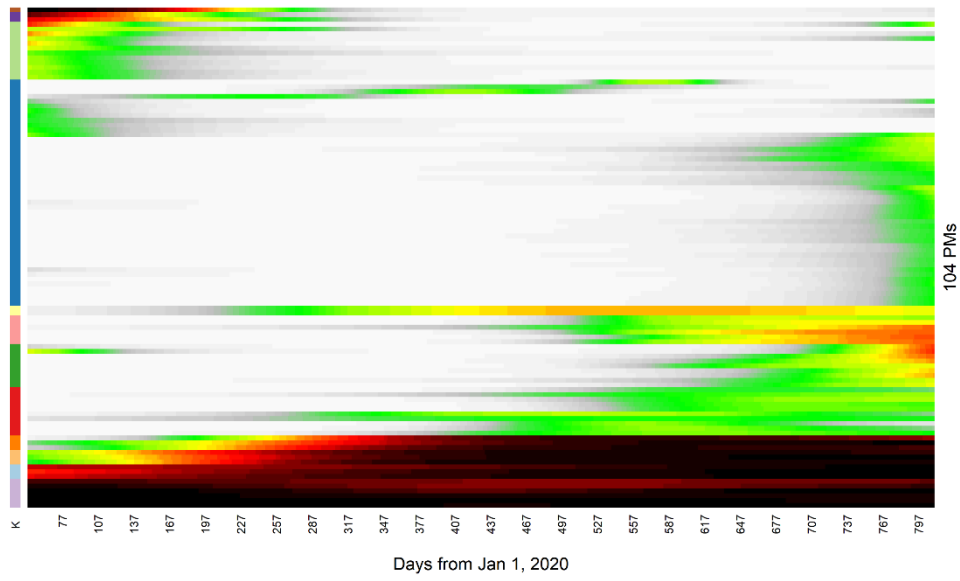

C) Delta

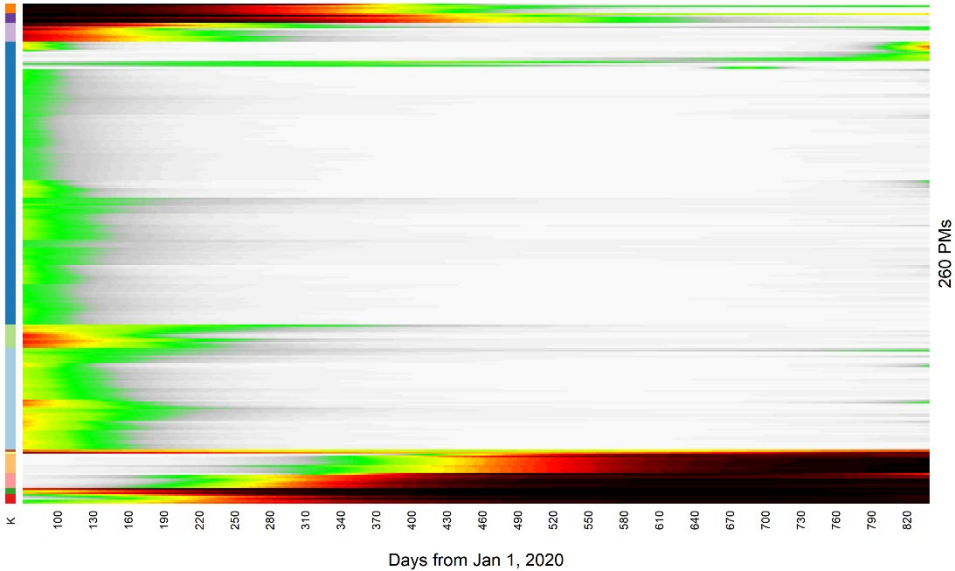



### D) Epsilon

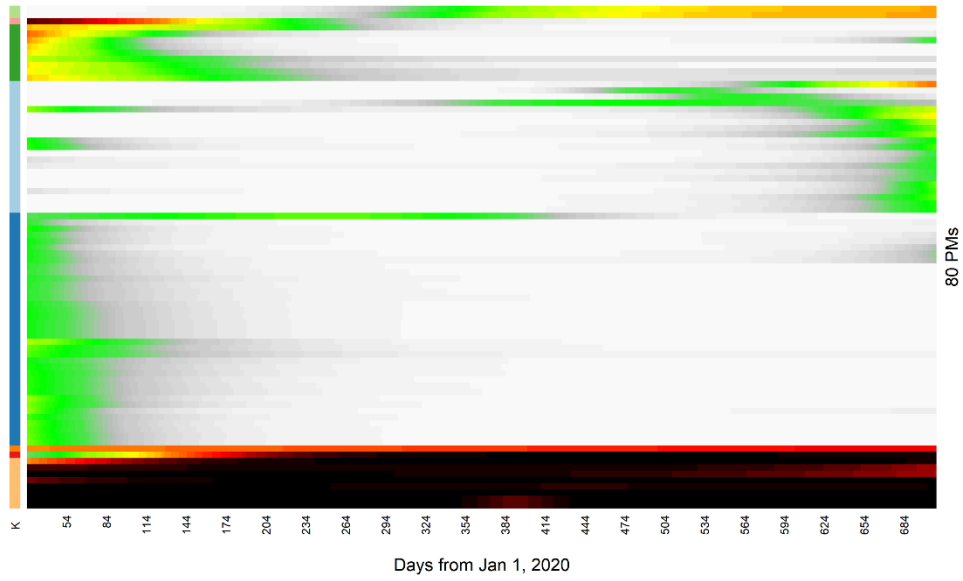

### E) Eta

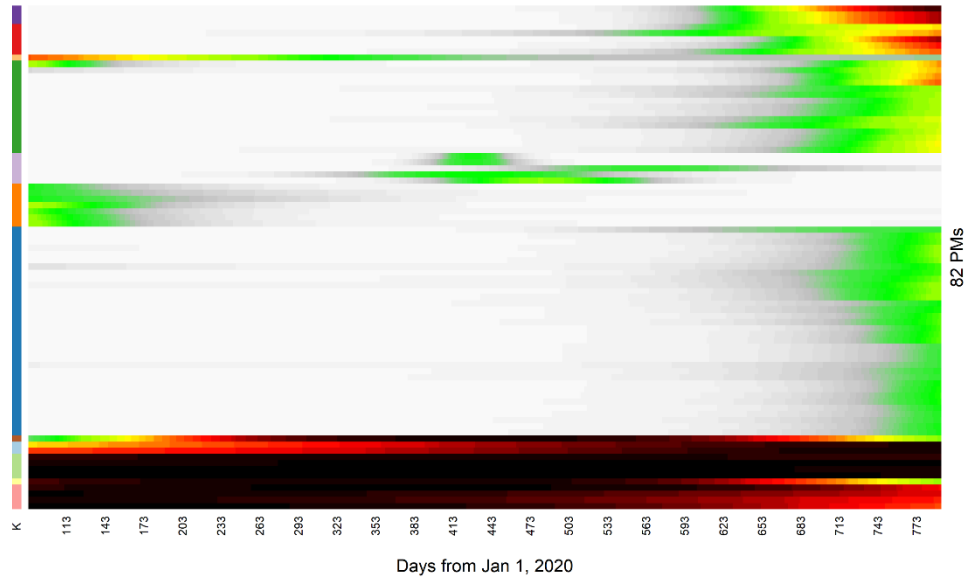

### F) Gamma

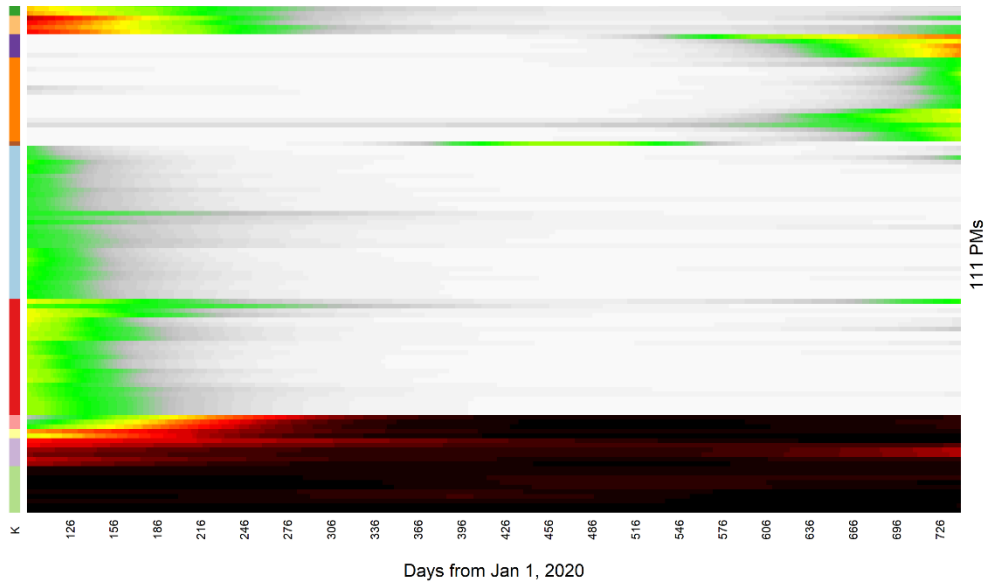

G) GH/450R

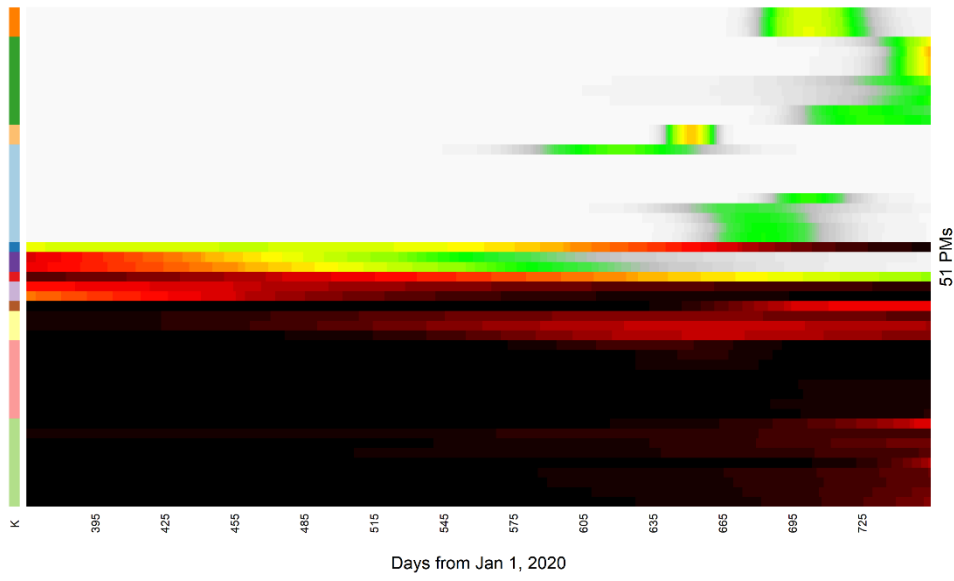

## H) Iota

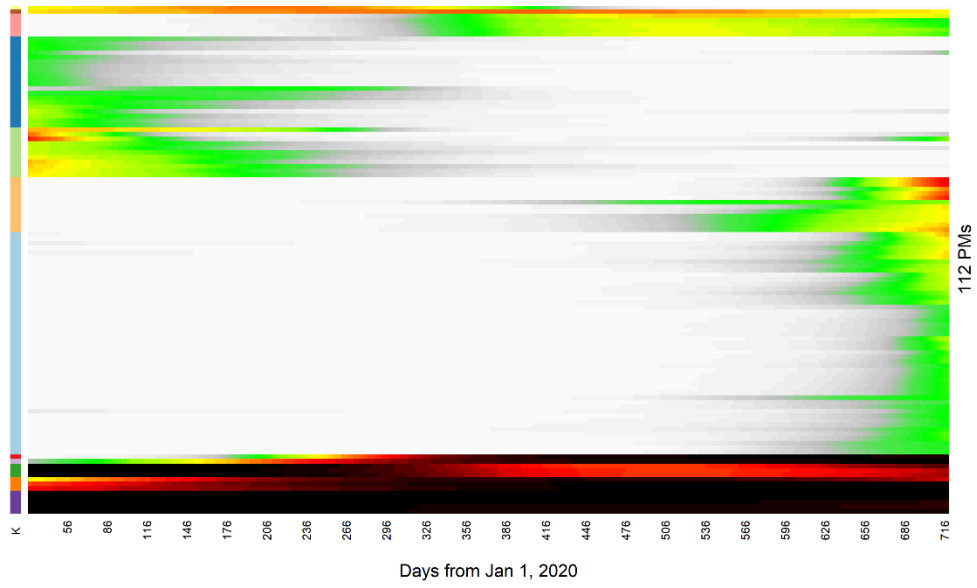

### I) Kappa

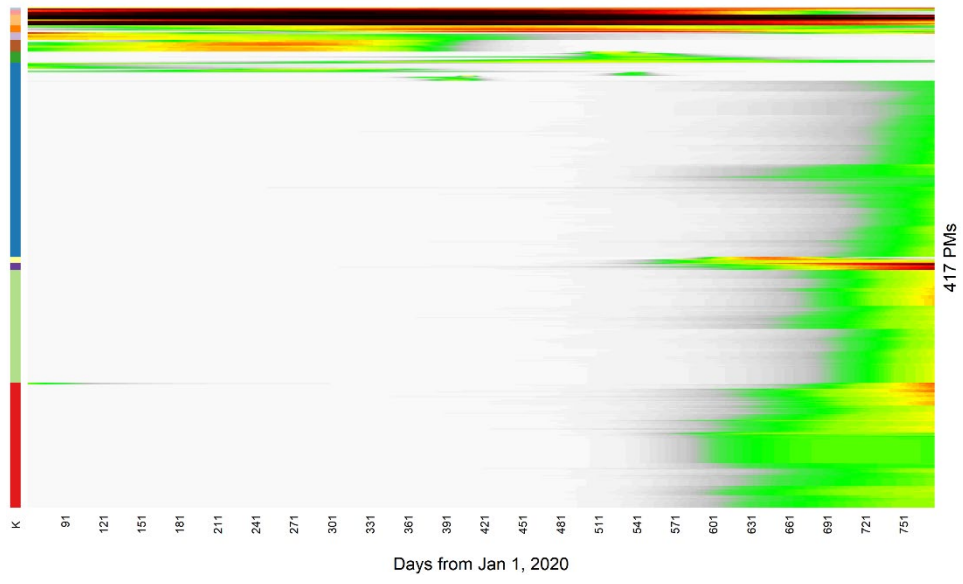

## J) Lambda

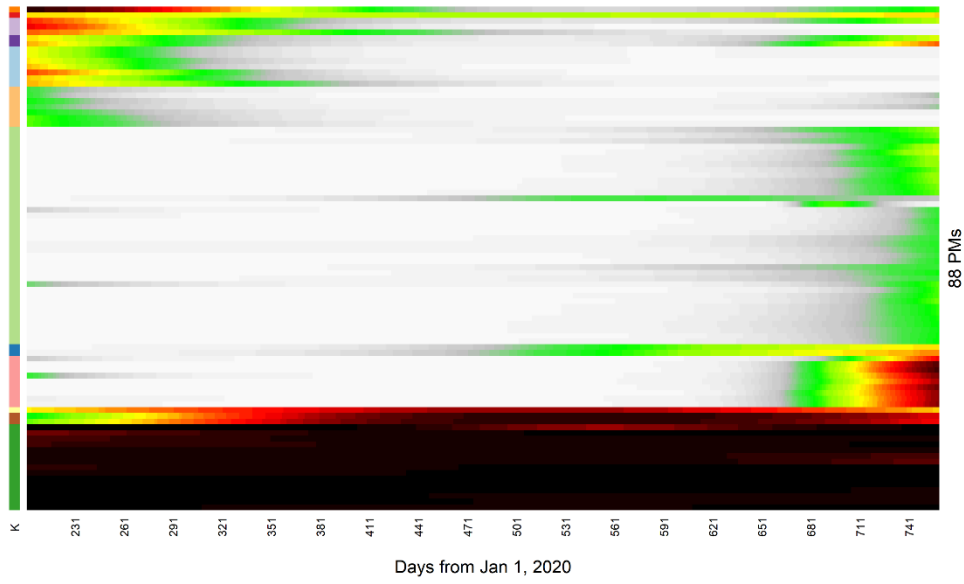

## L) Omicron

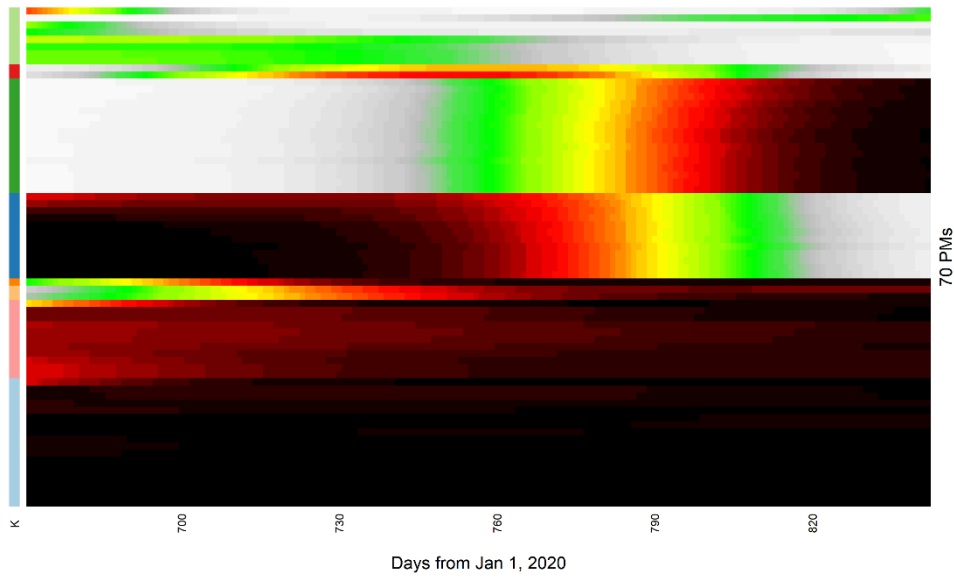



### M) Mu

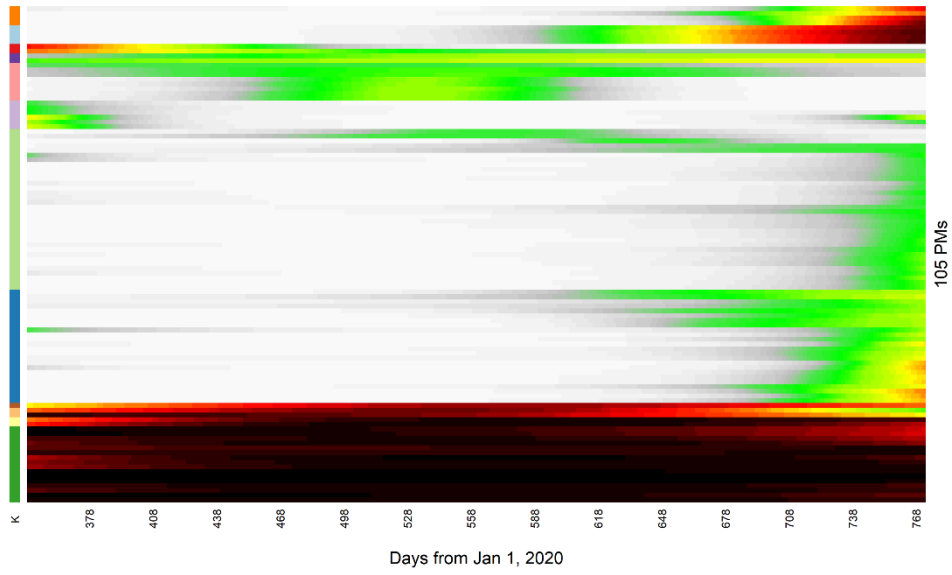

### N) Theta

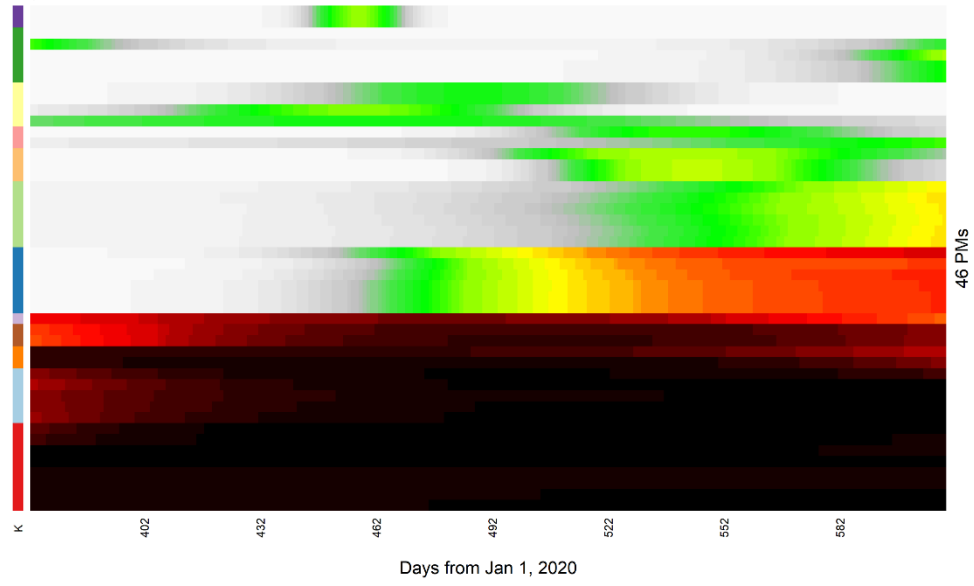

## N) Zeta

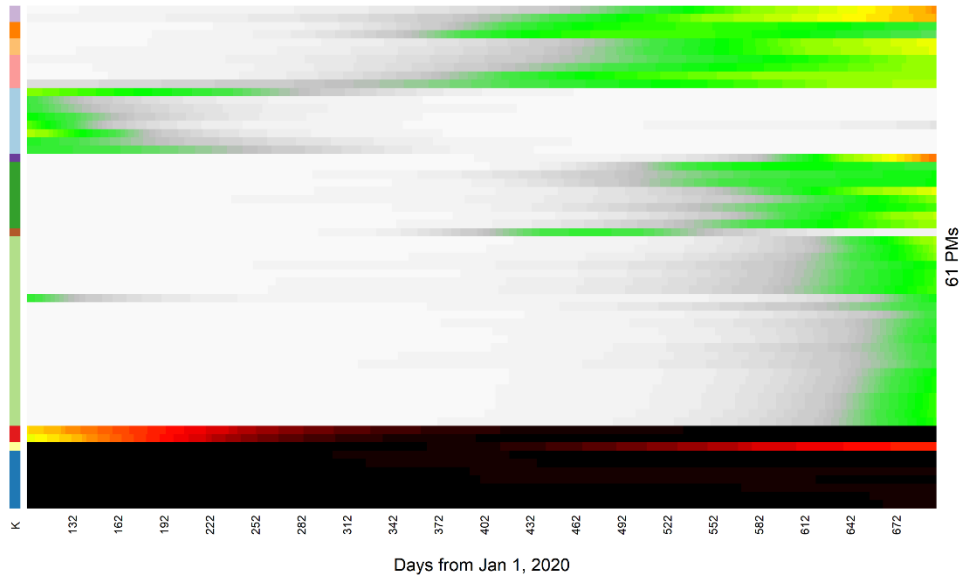

### O) Unassigned viruses

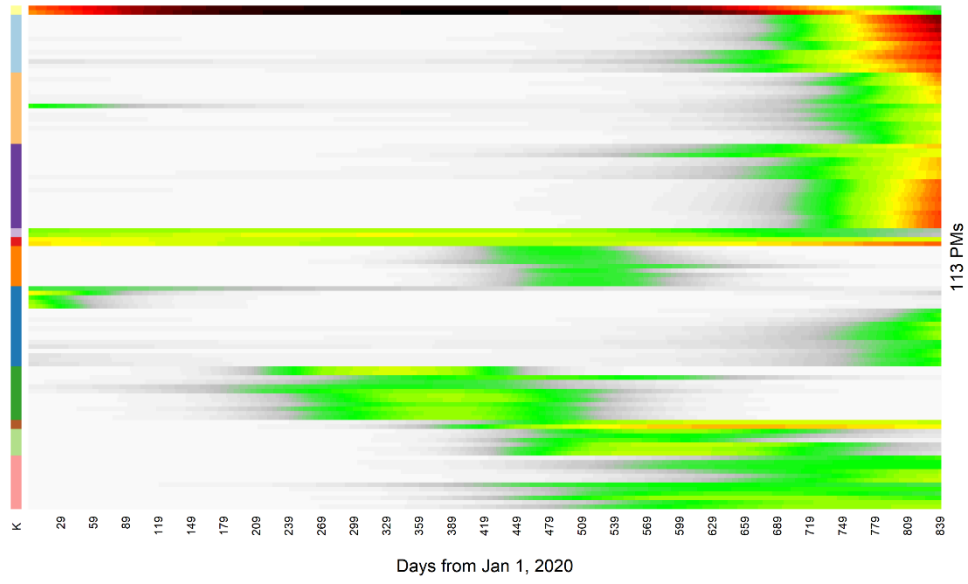

eFigure 2. Misclassification errors by haplotype-based variant prediction (HVP), when the prediction probability threshold value is set at 0.9 to 1

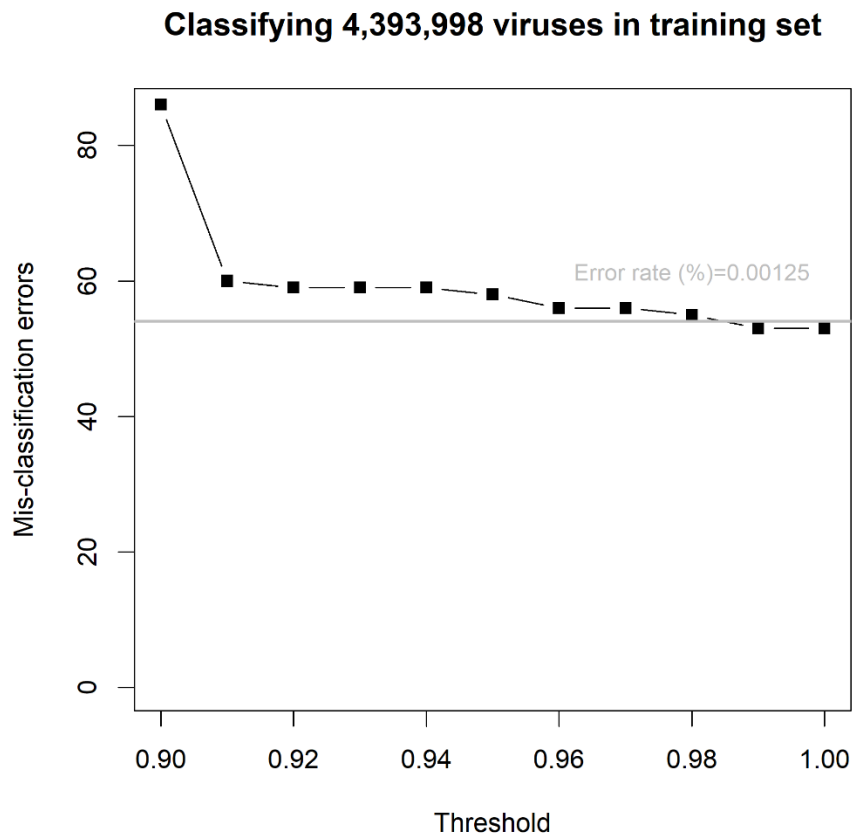

eFigure 3. Temporal patterns of sixteen polymutants identified from variant-unassigned 524 viruses that are unpredictable by HAI, excluding those core polymutants of all fourteen variants.

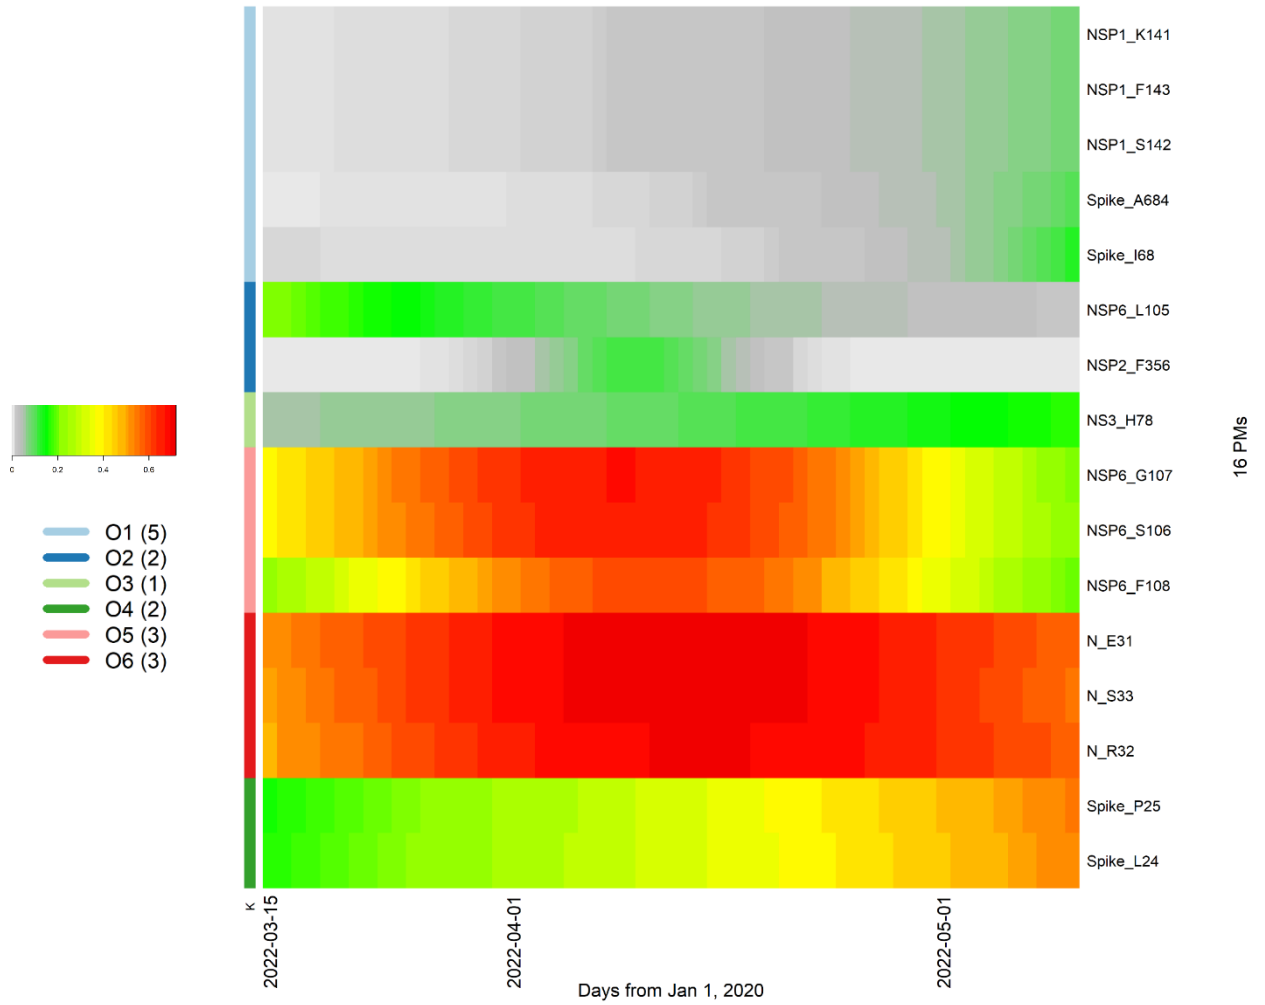

Supplement: jamanetwopen-e230191-s001.pdf [file jamanetwopen-e230191-s001.pdf]
