# Supplementary material for: Using Haplotype-Based Artificial Intelligence to Evaluate SARS-CoV-2 Novel Variants and Mutations
Source: PubMed Central journal article supplement (PMC9945077; doi:10.1001/jamanetworkopen.2023.0191), 2023-02-21
Supplement: jamanetwopen-e230191-s002.pdf [file jamanetwopen-e230191-s002.pdf]

## **Data Sharing Statement**

Zhao. Using Haplotype-Based Artificial Intelligence to Evaluate SARS-CoV-2 Novel Variants and Mutations. *JAMA Netw Open*. Published online February 21, 2023. doi: 10.1001/jamanetworkopen.2023.0191

## **Data**

**Data available:** No
